# Supplementary material for: Low-entropy lattices engineered through bridged DNA origami frames
Source: Royal Society of Chemistry journal article supplement (doi:10.1039/d1sc05060e), 2021-12-08
Supplement: d1sc05060e1.pdf [file d1sc05060e1.pdf]

## **Supporting Information**

### **Low-entropy lattices engineered through bridged DNA origami frames**

*Di Gao, Ningning Ma, Xuehui Yan, Min Ji, Jun-Jie Zhu,\* Qianhao Min,\*and Ye Tian\**

## Materials

M13mp18 DNA was purchased from Bayou Biolabs, America. All short oligonucleotides were purchased from Sangon Biotech Co. Ltd (Shanghai, China). 10 nm AuNPs were purchased from Ted Pella Inc. Carbon-coated copper grids were purchased from Beijing Zhongjingkeyi Technology Co. Ltd (Beijing, China).

## Design and synthesis of DNA origami frames

Octahedron, cube, hexagonal bipyramid and elongated octahedron DNA origami frames were designed by caDNAno software (downloaded from <http://cadnano.org/>). In the design, each edge of these frames was composed of a six-helix bundle. For the octahedral and cubic frames, the length of all the edges is 88 base pairs. For each hexagonal bipyramid, the bottom edges of the hexagonal pyramid are 46 base pairs in length, and the length of side edges was 67 base pairs. For an elongated octahedral frame, the length of four bottom edges is 88 base pairs that is equal to the octahedron's, and its side edges are 109 base pairs in length.

DNA origami frames were folded by mixing 10 nM M13mp18 scaffold DNA, 100 nM of each designed staple oligonucleotide (including a certain number of capture DNAs for encaging 10 nm AuNPs inside) in a buffer solution containing 12.5 mM magnesium acetate, 1 mM EDTA and 40 mM tris acetate with a pH around 8.3. The mixed solution was then cooled by a gradient according to the annealing procedure below:

1. 90 °C      25 sec
2. 90 °C ~ 85 °C   -0.1 °C / 5 sec
3. 85 °C ~ 65 °C   -0.1 °C / 30 sec
4. 65 °C ~ 40 °C   -0.1 °C / 4 min
5. 40 °C ~ 32 °C   -0.1 °C / 2 min
6. 32 °C ~ 20 °C   -0.1 °C / 1 min
7. Hold at 20 °C

Prepared DNA origami frames were stored at room temperature.

## DNA functionalization of gold nanoparticles

200 μM of 3'-thiolated oligonucleotides aqueous solution were incubated with tris-(2-carboxyethyl) phosphine (TCEP) in a ratio of 1:100 (DNA: TCEP). The mixed solution was kept in an ice bath for 1.5 hours, and then purified using a size exclusion column (G-25, GE Healthcare) to remove redundant TCEP. Treated thiolated oligonucleotides were mixed with 10 nm spherical gold nanoparticles with a ratio of 300:1, followed by buffering the solution to obtain 10 mM phosphate buffer (pH 7) after 1.5 hours. In the subsequent salt-aging process, 2

M NaCl solution was slowly added into the solution in five steps to reach a final NaCl concentration of 0.3 M. The solution was aged at room temperature for 18 hours. Excess oligonucleotides were then removed by centrifuging (20,000 rcf, 1h) the solution 4 times and resuspending with the washing buffer containing 0.1 M NaCl and 10 mM phosphate. The concentration of AuNPs was measured by UV-vis spectrometer and calculated with Lambert-Beer law.

### **Encaging AuNPs inside DNA origami frames for conjugated monomers**

In order to insert AuNPs inside the DNA origami frames, functionalized AuNPs and prepared DNA origami frames were mixed at a ratio of 1.2:1. The mixed solution was then cooling from 50 °C to 20 °C at a rate of 0.6 °C h<sup>-1</sup> to obtain a high yield.

### **Fabrication of 3D lattices and 2D planar structures**

According to the design of each system, corresponding bridging DNA strands and functionalized AuNPs were added into the prepared DNA origami frame solution. The molar ratio between the frames, bridged DNA strands and AuNPs was 1:1:1.2. To reduce the effect of dilution, a few of 125 mM magnesium acetate solution was added to adjust the magnesium salt concentration to original 12.5 mM. The mixed solution was then slowly cooled by a gradient according to the annealing procedure below:

1. 20 °C ~ 50 °C +1 °C / min
2. 50 °C ~ 20 °C -0.2 °C / 1 h
3. Hold at 20 °C

This procedure was repeated another two times to produce the final sample. Prepared 3D lattices and 2D planar structures were stored at 4 °C.

### **Silicification of DNA frameworks**

The supernatant of the prepared 3D lattice solution was pipetted out slowly without disturbing bottom aggregates, followed by buffering with a solution containing 7.0 mM magnesium acetate, 1 mM EDTA and 40 mM tris acetate to remove free staple DNAs and AuNPs. 0.79 µL of 10 % (v/v) N-trimethoxysilylpropyl-N,N,N-trimethylammonium chloride (TMAPS) methanol solution was then mixed with the lattice solution and shaken at 20 °C for 20 min. Subsequently, 0.90 µL 10% (v/v) tetraethoxysilane (TEOS) methanol solution was added and kept shaking at 20 °C for 30 min.<sup>1</sup> After the shaking, the solution was allowed to stand for about 12 hours. The supernatant of the final solution was pipetted out and the aggregates were washed slowly with ultrapure water for several times.

## TEM sample preparation and imaging

The sample solution of 5  $\mu\text{L}$  was dropped onto a glow-discharged carbon-coated grid and deposited for 4 minutes. The droplet was then wicked away by a piece of filter paper along the edge of the grid. 5  $\mu\text{L}$  of 2% (w/v) uranyl acetate aqueous solution was then dropped onto the carbon-coated grid. After staining for 8 seconds, the excess staining solution was wicked away in the same manner and dried in the air. The negative-stained sample was imaged by a JEM-2800 TEM operating at 200 kV.

## SEM of siliconized samples

The silicon slice, as the SEM substrate, was carefully cleaned with ethanol and water in advance. 6  $\mu\text{L}$  siliconized sample solution was dropped onto the silicon slice and dried under an infrared light. The sample was then imaged on the Zeiss Ultra Plus FE-SEM.

## SAXS experimental methods

The SAXS measurements were conducted at the beamline BL19U2 at Shanghai Synchrotron Radiation Facility (SSRF). 50  $\mu\text{L}$  of the sample solution was transferred to a glass capillary with an inner diameter of 1 mm. The capillary was sealed with wax to maintain the liquid phase and the aggregates sedimentated at its bottom. The 2D scattering data were collected on a Dectris Pilatus 2 M pixel-array detector with 12 keV (wavelength  $\lambda = 0.932 \text{ \AA}$ ) incident X-rays.

Area images were integrated into a 1D  $I(q)$  scattering curve according to the function  $q = 4 \frac{\pi}{\lambda} \sin\left(\frac{\theta}{2}\right)$  of the scattering vector  $q$ , where  $\theta$  is the scattering angle.<sup>2</sup> The structure factor  $S(q)$  was obtained by dividing  $I(q)$  by the corresponding particle form factor  $P(q)$ .

## The geometric models for polyhedral DNA origami frames

The polyhedral DNA origami frame geometric models are shown in Figure S2, and described using  $d_1, d_2, L_1, L_2, L_3$  and  $L_4$  as the width and length of the polyhedral edges. The exact values are calculated based on the following constants: the helix width of DNA is 2.0 nm and the distance between adjacent base pairs is 0.34 nm. Stereo modeling shows the simplified frame geometry accurate to each double helix (represented by the cylinder). Potential deformations are not involved in these models.

## Close-packed models and bridge pattern models for 3D lattices

According to the pre-designed arrangements of polyhedral frames, we constructed a series of close-packed 3D lattice models with no gaps (Figures S15-S17 and S34). Considering the

steric hindrance caused by adjacent structures, the vertices of DNA origami frames just touch each other. At bridged junctions, both the octahedral and cubic frames are illustrated with a pair of vertices as shown in Figures S6 and S8. Due to the difference in crystal growth directions, the hexagonal bipyramid and binary systems exhibit two non-identical crystallographic axis directions respectively (Figures S7 and S31). The lattice parameter values of these models calculated according to the space analytic geometry are as follows:

Geometric constants involved:

$$\mathbf{d}_1 = 5.5 \text{ nm}; \mathbf{d}_2 = 6.0 \text{ nm};$$

$$\mathbf{L}_1 = 29.9 \text{ nm}; \mathbf{L}_2 = 22.8 \text{ nm}; \mathbf{L}_3 = 15.7 \text{ nm}; \mathbf{L}_4 = 37.1 \text{ nm}$$

Octahedron model:

$$\mathbf{a} = \mathbf{b} = \mathbf{c} = \sqrt{2}(\mathbf{L}_1 + \mathbf{d}_1) = 50.1 \text{ nm}$$

Cube model:

$$\mathbf{a} = \mathbf{b} = \mathbf{c} = 2\left(\mathbf{L}_1 + \frac{\mathbf{d}_2}{2}\right) = 65.8 \text{ nm}$$

Hexagonal bipyramid model:

$$\mathbf{a} = \mathbf{b} = 2(\mathbf{L}_3 + \mathbf{d}_1) = 42.4 \text{ nm}$$

$$\mathbf{c} = 2\sqrt{\mathbf{L}_2^2 - \mathbf{L}_3^2} + \sqrt{2}\mathbf{d}_2 = 41.6 \text{ nm}$$

Binary system model:

$$\mathbf{a} = \mathbf{b} = \sqrt{2}(\mathbf{L}_1 + \mathbf{d}_1) = 50.1 \text{ nm}$$

$$\mathbf{c} = \frac{\sqrt{2}(\mathbf{L}_1 + \mathbf{d}_1)}{2} + \sqrt{(\mathbf{L}_4 + \mathbf{d}_1)^2 - \left(\frac{\sqrt{2}(\mathbf{L}_1 + \mathbf{d}_1)}{2}\right)^2} = 59.4 \text{ nm}$$

### SAXS model fitting and lattice parameter calculation

The theoretical scattering data of the lattice structures was calculated by using PowderCell software. For the simple cubic and body-centered cubic lattices with defined structural parameters, we calibrated the first SAXS peak ( $q_1$ ) of the experimental data with the first peak in theoretical spectrums to compare the peak positions and the intensity ratio. We then calculated the experimental lattice parameters in cubic lattices ( $\mathbf{a} = \mathbf{b} = \mathbf{c}$ ) based on the peak position of  $q_1$ . The three lattice parameters of the simple hexagonal and tetragonal structures are not equal ( $\mathbf{a} = \mathbf{b} \neq \mathbf{c}$ ). We first calculated their experimental values using the first two SAXS peaks ( $q_1$  and  $q_2$ ), and then performed the calibration. The lattice parameter values calculated from the experimental data are as follows:

Simple cubic lattice, octahedron:

$$a = b = c = \frac{2\pi}{q_1} = 50.0 \text{ nm} (q_1 = 0.1258 \text{ nm}^{-1})$$

Body-centered cubic lattice, cube:

$$a = b = c = \frac{2\sqrt{2}\pi}{q_1} = 65.9 \text{ nm} (q_1 = 0.1349 \text{ nm}^{-1})$$

Simple hexagonal lattice, hexagonal bipyramid:

$$a = b = \frac{4\sqrt{3}\pi}{3q_2} = 43.0 \text{ nm} (q_2 = 0.1687 \text{ nm}^{-1})$$

$$c = \frac{2\pi}{q_1} = 42.1 \text{ nm} (q_1 = 0.1494 \text{ nm}^{-1})$$

Simple tetragonal lattice, binary system:

$$a = b = \frac{2\pi}{q_2} = 50.0 \text{ nm} (q_2 = 0.1258 \text{ nm}^{-1})$$

$$c = \frac{2\pi}{q_1} = 58.4 \text{ nm} (q_1 = 0.1076 \text{ nm}^{-1})$$

## DNA Sequences

### a. Staple strands of octahedral DNA origami frame

|               |                                             |
|---------------|---------------------------------------------|
| Oct-staple-1  | TGTAGCATTCCAACGTTAGTAAATGAAGTGCCGCGCCACCCT  |
| Oct-staple-2  | CTTAAACAGCTTATATATTCGGTCGCTTGATGGGGAACAAGA  |
| Oct-staple-3  | AATAGCAATAGCACCAGAAGGAAACCTAAAGCCACTGGTAAT  |
| Oct-staple-4  | AGCTTTCATCAACGGATTGACCGTAAAATCGTATAATATTTT  |
| Oct-staple-5  | CTTCATCAAGAGAAATCAACGTAACAGAGATTTGTCAATCAT  |
| Oct-staple-6  | AAAGATTCATCAGGAATTACGAGGCATGCTCATCCTTATGCG  |
| Oct-staple-7  | ATAAATCATAATAAATCGGTTGTAAGTGTGCTGGCATGCCTG  |
| Oct-staple-8  | CAACGCTCAACAGCAGAGGCATTTTCAATCCAATGATAAATA  |
| Oct-staple-9  | AAACGAAAGAGGGCGAAACAAAGTACTGACTATATTCGAGCT  |
| Oct-staple-10 | AGAGCCTAATTTGATTTTTTTGTTTAAATCCTGAAATAAAGAA |
| Oct-staple-11 | GACAGGAGGTTGAAACAAATAAATCCGCCCCCTCCGCCACCC  |
| Oct-staple-12 | TCATATGGTTTACGATTGAGGGAGGGAAACGCAATACATACA  |
| Oct-staple-13 | GGTAGCTATTTTAGAGAATCGATGAAAACATTAAATGTGTAG  |
| Oct-staple-14 | GAAACATGAAAGCTCAGTACCAGGCGAAAAATGCTGAACAAA  |
| Oct-staple-15 | ATCAAAATCATATATGTAAATGCTGAACAAACACTTGCTTCT  |
| Oct-staple-16 | AACGGGTATTAAGGAATCATTACCGCCAGTAATTCAACAATA  |
| Oct-staple-17 | ACTGTTGGGAAGCAGCTGGCGAAAGGATAGGTCAAGATCGCA  |
| Oct-staple-18 | CAGAATCAAGTTTCGGCATTTCGGTTAAATATATCACCAGT   |
| Oct-staple-19 | GCTCACAATTCCGTGAGCTAACTCACTGGAAGTAATGGTCAA  |

Oct-staple-20 TGATTGCTTTGAGCAAAAGAAGATGAAATAGCAGAGGTTTTG  
 Oct-staple-21 GGCCCTGAGAGAAGCAGGCGAAAATCATTGCGTAGAGGCGGT  
 Oct-staple-22 TTTGCGGATGGCCAACTAAAGTACGGGCTTGCAGCTACAGAG  
 Oct-staple-23 CAAATGCTTTAAAAAATCAGGTCTTTAAGAGCAGCCAGAGGG  
 Oct-staple-24 TTTGCGGAACAATGGCAATTCATCAATCTGTATAATAATTTT  
 Oct-staple-25 GTCACCAGAGCCATGGTGAATTATCACCAATCAGAAAAGCCT  
 Oct-staple-26 GGACAGAGTTACTTTGTGCGAAATCCGCGTGTATCACCGTACG  
 Oct-staple-27 CAACATGATTTACGAGCATGGAATAAGTAAGACGACAATAAA  
 Oct-staple-28 AACCAGACGCTACGTTAATAAAACGAACATACCACATTCAGG  
 Oct-staple-29 TGACCTACTAGAAAAAGCCCCAGGCAAAGCAATTCATCTTC  
 Oct-staple-30 TGCCGGAAGGGGACTCGTAACCGTGCATTATATTTTAGTTCT  
 Oct-staple-31 AGAACCCCAAATCACCATCTGCGGAATCGAATAAAAATTTTT  
 Oct-staple-32 GCTCCATTGTGTACCGTAACACTGAGTTAGTTAGCGTAACCT  
 Oct-staple-33 AGTACCGAATAGGAACCCAAACGGTGTAACTCAGGAGGTTT  
 Oct-staple-34 CAGTTTGAATGTTTAGTATCATATGCGTAGAATCGCCATAGC  
 Oct-staple-35 AAGATTGTTTTTAAACCAAGAAACCATCGACCCAAAAACAGG  
 Oct-staple-36 TCAGAGCGCCACCACATAATCAAAAATCAGAACGAGTAGTATG  
 Oct-staple-37 GATGGTTGGGAAGAAAAATCCACCAGAAATAATTGGGCTTGA  
 Oct-staple-38 CTCCTAACGTAGAAACCAATCAATAATTCATCGAGAACAGA  
 Oct-staple-39 AGACACCTTACGCAGAACTGGCATGATTTTCTGTCCAGACAA  
 Oct-staple-40 GCCAGCTAGGCGATAGCTTAGATTAAGACCTTTTTAACCTGT  
 Oct-staple-41 CCGACTTATTAGGAACGCCATCAAAAATGAGTAACAACCCCA  
 Oct-staple-42 GTCCAATAGCGAGAACCAGACGACGATATTCAACGCAAGGGA  
 Oct-staple-43 CCAAATACAATATGATATTCAACCGTTAGGCTATCAGGTAA  
 Oct-staple-44 AACAGTACTTGAAAACATATGAGACGGGTCTTTTTTAATGGA  
 Oct-staple-45 TTTACCGCATTAAAGTCGGGAAACCTGATTTGAATTACCCA  
 Oct-staple-46 GAGAATAGAGCCTTACCGTCTATCAAATGGAGCGGAATTAGA  
 Oct-staple-47 ATAATTAATTTAAAAAACTTTTTCAAACTTTTAACAACGCC  
 Oct-staple-48 GCACCCAGCGTTTTTTATCCGGTATTCTAGGCGAATTATTCA  
 Oct-staple-49 GGAAGCGCCACAAACAGTTAATGCCCGACTCCTCAAGATA  
 Oct-staple-50 GTTTGCCTATTACAGGCAGGTCAGACGCCACCACACCACC  
 Oct-staple-51 CGCGAGCTTAGTTTTTCCAATTCTGCGCAAGTGTAAGCCT  
 Oct-staple-52 AGAAGCAACCAAGCCAAAAGAATACACTAATGCCAAAACCTCC  
 Oct-staple-53 ATTAAGTATAAAGCGGCAAGGCAAAGAACTAATAGGGTACC  
 Oct-staple-54 CAGTGCCTACATGGGAATTTACCGTTCCACAAGTAAGCAGAT  
 Oct-staple-55 ATAAGGCGCCAAAAGTTGAGATTTAGGATAACGGACCAGTCA  
 Oct-staple-56 TGCTAAACAGATGAAGAAACCACCAGAATTTAAAAAAAGGCT  
 Oct-staple-57 CAGCCTTGGTTTTGTATTAAGAGGCTGACTGCCTATATCAGA  
 Oct-staple-58 CGGAATAATTC AACCCAGCGCCAAAGACTTATTTTAACGCAA  
 Oct-staple-59 CGCCTGAATTACCCTAATCTTGACAAGACAGACCATGAAAGA

Oct-staple-60 ACGCGAGGCTACAACAGTACCTTTTACAAATCGCGCAGAGAA  
 Oct-staple-61 CAGCGAACATTAAAAGAGAGTACCTTTACTGAATATAATGAA  
 Oct-staple-62 GGACGTTTAATTTTCGACGAGAAACACCACCACTAATGCAGAT  
 Oct-staple-63 AAAGCGCCAAAGTTTATCTTACCGAAGCCCAATAATGAGTAA  
 Oct-staple-64 GAGCTCGTTGTAAACGCCAGGGTTTTCCAAAGCAATAAAGCC  
 Oct-staple-65 AATTATTGTTTTTCATGCCTTTAGCGTCAGATAGCACGGAAAC  
 Oct-staple-66 AAGTTTCAGACAGCCGGGATCGTCACCCTTCTGTAGCTCAAC  
 Oct-staple-67 ACAAAGAAATTTAGGTAGGGCTTAATTGTATACAACGGAATC  
 Oct-staple-68 AACAAAATAACTAGGTCTGAGAGACTACGCTGAGTTTCCCT  
 Oct-staple-69 CATAACCTAAATCAACAGTTCAGAAAACGTCATAAGGATAGC  
 Oct-staple-70 CACGACGAATTCGTGTGGCATCAATTCTTTAGCAAAATTACG  
 Oct-staple-71 CCTACCAACAGTAATTTTATCCTGAATCAAACAGCCATATGA  
 Oct-staple-72 GATTATAAAGAAACGCCAGTTACAAAATTTACCAACGTCAGA  
 Oct-staple-73 AGTAGATTGAAAAGAATCATGGTCATAGCCGGAAGCATAAGT  
 Oct-staple-74 TAGAATCCATAAATCATTTAACAATTTCTCCCGGCTTAGGTT  
 Oct-staple-75 AAAGGCCAAATATGTTAGAGCTTAATTGATTGCTCCATGAGG  
 Oct-staple-76 CCAAAGGAAAGGACAACAGTTTCAGCGAATCATCATATTCC  
 Oct-staple-77 GAAATCGATAACCGGATACCGATAGTTGTATCAGCTCCAACG  
 Oct-staple-78 TGAATATTATCAAATAATGGAAGGGTTAATATTTATCCCAA  
 Oct-staple-79 GAGGAAGCAGGATTCGGGTAAAATACGTAAAACACCCCCAG  
 Oct-staple-80 GGTGATTTTTCCAGCAGACAGCCCTCATTTCGTCACGGGATAG  
 Oct-staple-81 CAAGCCCCACCCTTAGCCCGGAATAGGACGATCTAAAGTTT  
 Oct-staple-82 TGTAGATATTACGCGGCGATCGGTGCGGGCGCCATCTTCTGG  
 Oct-staple-83 CATCCTATTCAGCTAAAAGGTAAAGTAAAAGCAAGCCGTTT  
 Oct-staple-84 CAGCTCATATAAGCGTACCCCGGTTGATGTGTCTGGATTCTCC  
 Oct-staple-85 CATGTCACAAACGGCATTAAATGTGAGCAATTCGCGTTAAAT  
 Oct-staple-86 AGCGTCACGTATAAGAATTGAGTTAAGCCCTTTTTAAGAAAG  
 Oct-staple-87 TATAAAGCATCGTAACCAAGTACCGCACCGGCTGTAATATCC  
 Oct-staple-88 ATAGCCCGCGAAAATAATTGTATCGGTTCCGCCACAATGAGT  
 Oct-staple-89 AGACAGTTCATATAGGAGAAGCCTTTATAACATTGCCTGAGA  
 Oct-staple-90 AACAGGTCCCGAAATTGCATCAAAAAGATCTTTGATCATCAG  
 Oct-staple-91 ACTGCCCTTGCCCCGTTGCAGCAAGCGGCAACAGCTTTTTTCT  
 Oct-staple-92 TCAAAGGGAGATAGCCCTTATAAATCAAGACAACAACCATCG  
 Oct-staple-93 GTAATACGCAAACATGAGAGATCTACAACACTAGCTGAGGCCGG  
 Oct-staple-94 GAGATAACATTAGAAGAATAACATAAAAAGGAAGGATTAGGA  
 Oct-staple-95 CAGATATTACCTGAATACCAAGTTACAATCGGGAGCTATTTT  
 Oct-staple-96 CATATAACTAATGAACACAACATACGAGCTGTTTCTTTGGGG  
 Oct-staple-97 ATGTTTTGCTTTTGATCGGAACGAGGGTACTTTTTCTTTTGA  
 Oct-staple-98 GGGGTGCCAGTTGAGACCATTAGATACAATTTTCACTGTGTG  
 Oct-staple-99 CTTCGCTGGGCGCAGACGACAGTATCGGGGCACCGTCGCCAT



Oct-staple-100 TCAGAGCTGGGTAAACGACGGCCAGTGCGATCCCCGTAGTAG  
 Oct-staple-101 TTAGCGGTACAGAGCGGGAGAATTAAGTTCGCTAATTTTCGGA  
 Oct-staple-102 GATATTCTAAATTGAGCCGGAACGAGGCCCAACTTGGCGCAT  
 Oct-staple-103 TGTCGTCATAAGTACAGAACC GCCACCCATTTTCACAGTACA  
 Oct-staple-104 CGATTATAAGCGGAGACTTCAAATATCGCGGAAGCCTACGAA  
 Oct-staple-105 AACATGTACGCGAGTGGTTTTGAAATACCTAAACACATTCTTA  
 Oct-staple-106 GTCTGGATTTTTCGTTTTAAATGCAATGGTGAGAAATAAATT  
 Oct-staple-107 GCCTTGAATCTTTTCCGGAACCGCCTCCAGAGCCCAGAGCC  
 Oct-staple-108 CGCTGGTGCTTTTCTGAATCGGCCAACGAGGGTGGTGATTGC  
 Oct-staple-109 TGATTATCAACTTTACAATAAGGAATCCAAAAAGTTTGAG  
 Oct-staple-110 ACATAACTTGCCCTAACTTTAATCATTGCATTATAACAACAT  
 Oct-staple-111 GTAGCGCCATTAAATTGGGAATTAGAGCGCAAGGCGCACCGT  
 Oct-staple-112 TTATTTTACCGACAATGCAGAACGCGCGAAAAATCTTTCTT  
 Oct-staple-113 TTTCAATAGAAGGCAGCGAACCTCCCGATTAGTTGAAACAAT  
 Oct-staple-114 GGGCGACCCCAAAGTATGTTAGCAAATAAAAGAGTCACAA  
 Oct-staple-115 AGCCGAAAGTCTCTCTTTTGATGATACAAGTGCCTTAAGAGC  
 Oct-staple-116 GTGGGAAATCATATAAATATTTAAATTGAATTTTGTCTGGC  
 Oct-staple-117 CCCACGCGCAAATGGTTGAGTGTTCGTGGACTTGCTTT  
 Oct-staple-118 ATGACCACTCGTTTGGCTTTTGCAAAAGTTAGACTATATTCA  
 Oct-staple-119 TCCAAATCTTCTGAATTATTTGCACGTAGGTTAACGCTAAC  
 Oct-staple-120 GGGTTATTTAATTACAATATATGTGAGTAATTAATAAGAGTC  
 Oct-capture-1 ATCCATCACTTCATACTCTACGTTGTTGTTGTTGTTGGGGTGCCAG  
 TTGAGACCATTAGATACAATTTTCACTGTGTG  
 Oct-capture-2 ATCCATCACTTCATACTCTACGTTGTTGTTGTTGTTTCAGAGCTGG  
 GTAAACGACGGCCAGTGCGATCCCCGTAGTAG  
 Oct-capture-3 ATCCATCACTTCATACTCTACGTTGTTGTTGTTGTTTTCAGCGGTAC  
 AGAGCGGGAGAATTAAGTTCGCTAATTTTCGGA  
 Oct-capture-4 ATCCATCACTTCATACTCTACGTTGTTGTTGTTGTTTTCAGATTATCAA  
 CTTTACAATAAAGGAATCCAAAAAGTTTGAG  
 Oct-capture-5 ATCCATCACTTCATACTCTACGTTGTTGTTGTTGTTGTAGCGCCAT  
 TAAATTGGGAATTAGAGCGCAAGGCGCACCGT  
 Oct-capture-6 ATCCATCACTTCATACTCTACGTTGTTGTTGTTGTTAGCCGAAAGT  
 CTCTCTTTTGATGATACAAGTGCCTTAAGAGC  
 Oct-capture-7 ATCCATCACTTCATACTCTACGTTGTTGTTGTTGTTGTGGGAAATC  
 ATATAAATATTTAAATTGAATTTTGTCTGGC  
 Oct-capture-8 ATCCATCACTTCATACTCTACGTTGTTGTTGTTGTTCCCACGCGCA  
 AAATGGTTGAGTGTTCGTGGACTTGCTTT

Note: In order to position one gold nanoparticle in the body center of the octahedral frame, ‘ATCCATCACTTCATACTCTACGTTGTTGTTGTTGTTGTT’ sequence was added in the blue marked staple DNA strands.

b. Bridging strands of octahedral DNA origami frame

Oct-bridge-1 TGTAGCCTTTTGTGAGAGGGTAATTGAGAACACCAAATAG

Oct-bridge-2 CTATTATTCTTTTTGTAAAATTCGCATTATAAACGTAACTAG  
 Oct-bridge-3 CATTATCATTTCAGGTCTAGAGCAAGCTTCAAGGCG  
 Oct-bridge-4 AACATCCATTTTTTCACGTTGAAAATCTTGCGAATGGGATTT  
 Oct-bridge-5 AACGCCTTTTGTAAAGATTCAAAAGGCCTGAGTTGACCCT  
 Oct-bridge-6 CGGAGAGTTTTTCAGAGCCACCCTCTCAGAACTCGAGAG  
 Oct-bridge-7 GCGCATTTTTATTGCGTAGATTTTCAAACAGATTGTTTTG  
 Oct-bridge-8 GTCTTTCCTTTTCTCCAGCCAGCTTCCCCTCAGGACGTTGG  
 Oct-bridge-9 TTCGCCTTTTAAGGGAACCGAAGTCTGAGCAGACGGTATCAT  
 Oct-bridge-10 GCTGACTTTTAAGCCTTAAATCAAGACTTGCGGAGCAAAT  
 Oct-bridge-11 ACAGGTAGTTTTGATAAGTCCTGAACAACCTGTTTAAAGAGAA  
 Oct-bridge-12 ATTCCAAGTTTTATTTAAGAAGTGGCTTGAATTATCAGTGA  
 Oct-bridge-13 GTATAAAGCTTTTGGTAATAGTAAAATGTAAGTTTTACTAT  
 Oct-bridge-14 CCCCCTTTTAGGCGTTAATAAGAAGACCGTGTGCGAAG  
 Oct-bridge-15 AGTGAATTTTTTTTCAAAGCGAACCAGACCGTTTTATATAGTC  
 Oct-bridge-16 CCAACCTATTTTGTAAATCGTCGCTATTGAATAACTCAAGAA  
 Oct-bridge-17 CAGCATTTTTTGTCTTGAGGACTAAAGAGCAACGGGGAGTT  
 Oct-bridge-18 AGGTCATTTTTTTCAGAACCGCCACCCTCTCAGAGTATTAGC  
 Oct-bridge-19 GTAGCGATTTTTAACCTGTTTAGCTATTTTCGCATTCATTC  
 Oct-bridge-20 TGTATCCTTTTAGCACCATTACCATTACAGCAAATGACGGA  
 Oct-bridge-21 CCGCCTTTTTTAAAGGTGGCAACATAGTAGAAAATAATAA  
 Oct-bridge-22 AATAGAAAATTTTTTTCGCTATTGGGCGCCCGGGGTGCGCTC  
 Oct-bridge-23 AACAAATGATTTTGTCCACTATTAAGAACCAGTTTTGGTTCC  
 Oct-bridge-24 GTGAATTTTTTAAAGTTTTAACGGGGTTCGGAGTGTAGAATGG

c. Staple strands of cubic DNA origami frame

cub-staple-1 GAGTAACAGTGCCATGAAAGTATTAACACGCATAAAGACAGC  
 cub-staple-2 TAAATAAGGCGTTAGAAAAAGCCTGTACTACCTACGCGAGAA  
 cub-staple-3 ATAGCTGTTTCCATAAAGTGTAAGCTGTTGGGCCAGTCACG  
 cub-staple-4 ATTAGACGGGAGGAGAGATAACCCACTTGATGGGGAACAAGA  
 cub-staple-5 ACCAGTAGCACCCCGTAATCAGTAGCATTATACATGTTACTT  
 cub-staple-6 ACGTAATGCCACCATCTTTGACCCCCAGGAGGAGTCTCTGA  
 cub-staple-7 AATCGTCATAAAAGTTCAGAAAACGAATAACGCATAGCGAGA  
 cub-staple-8 TACGCAGTATGTAAAGACACCACGGAAGAATTATTTTTCGGG  
 cub-staple-9 CGTTTTAGCGAATTGCACCCAGCTACATCCCATGAACAAGCA  
 cub-staple-10 ATCGCACTCCAGCCATTCAGGCTGCGGCCATCAGCGGATTGA  
 cub-staple-11 GGTTTATCAGCTATGACAACAACCATTCATAGTGGAGTGAGA  
 cub-staple-12 TTTGCGGAACAATGGCAATTCATCAATTATCCTATCCCAATC  
 cub-staple-13 CTCAGAGCCACCAGCCGCCAGCAGAATCAAATCTTTTCA  
 cub-staple-14 AGCTTAGATTAATAAATCATAGGTCTGACAAACAATATATGT  
 cub-staple-15 GAACTAACGGAATTCAACTAATGCAGATTGCTGCAGTTGATT

cub-staple-16 ATTTAAATTGTATTTTTTAACCAATAGGGTGCCTCTGCATTAA  
cub-staple-17 CTGATTGCCCTTAGCAGGCGAAAATCCCGGAGAATGAACGGT  
cub-staple-18 TTGGGGCGCGAGATCATACAGGCAAGTGCTCATACTTTAATC  
cub-staple-19 TGATTGCTTTGAGCAAAAGAAGATGATATCATACAACGCCAA  
cub-staple-20 AGATTCAAAGGCTAGCTGATAAATTATTGAGTAGCAGATAG  
cub-staple-21 AGAGAGTACCTTCGGATGGCTTAGAGGACCATAAGCCCGAAA  
cub-staple-22 AGGCGCATAGGCAAATCAACGTAACAGTTTATTGAGGGAAGG  
cub-staple-23 GACGACAATAAACTGAACAAGAAAAAATCCTGAAATAAAGAA  
cub-staple-24 CCCAATAGGAACGCATTCCACAGACACTGAGACGTGTATCAC  
cub-staple-25 GAGAAGGGCCTGTACCATGTACCGTAACCCACCCTCCACCCT  
cub-staple-26 GCTATTACTTTTTTCATTTAACAATTTCCAGCTGGCGAAAAA  
cub-staple-27 TAATAATTTGCTAATGTCGTCTTTCCAGATGCTTGATACCGA  
cub-staple-28 GAAACAAAGCAGCAATTACCATTAGCAAATTTGGGCAATCAT  
cub-staple-29 AATCAATATTACCCTGGCTGACCTTCATGAGGACATTAAGG  
cub-staple-30 GAAATCGAATATCAAATTAAGTGAACACAGAATAATCCAACG  
cub-staple-31 GACCATTCGGTGTGATGTTTTAAATATGGAATCAGTTGAGAT  
cub-staple-32 AGGTCAGAAACACTTACGAAGGCACCAAGGAAGTTTACATGG  
cub-staple-33 GTAACAAATCGTAACCGTGACCAGACCGGAAAATGTGAGCGA  
cub-staple-34 AAGCAAAGACATCTGCCAGTTTGAGGGGCGCTTCTGGTGAG  
cub-staple-35 TACAAATTACCTGAATACCAAGTTACAATCGGGAGTTGAGC  
cub-staple-36 AATCAGGATTTTTGTAATTGCTCCTTTTGAAGCAATCGAGCT  
cub-staple-37 TACGAGCTGCTATTCCTCCCGACTTGCGTTATCCGGAATCAT  
cub-staple-38 TAACCCTGTAAAATCTCCAAAAAAAAGGATTTCTTAAACACA  
cub-staple-39 TGAATATTATCAAATAATGGAAGGGTTGCGCCTGTTTATCA  
cub-staple-40 AAATAAATGATACAAGACTTTTTTCATGACCTAAAACGAAAAA  
cub-staple-41 AGGCCGCGGACTAAGGAGTGTACTGGTAAATGCCCCCTGCAC  
cub-staple-42 TAAAGTAAGATACACAGTCAGGACGTTGGTAGAAAGATTAC  
cub-staple-43 ATCTTCTTGATGCAGGGTTATATACTACTCAGTACCAGGCC  
cub-staple-44 AATAATAAACCGTTGTGAGAAAGGCCGGCAATGCACCGAGG  
cub-staple-45 CAGTAATGGGCTTAAGTATAAAGCCAACAGGCGAATTATTCA  
cub-staple-46 CTTTTGATCCTCATGCCTTGATATTCACTTGAGGCAAAAGAA  
cub-staple-47 TCGGTTGGAACCCCTCGGAATACCCAAAAAATACATACATAAA  
cub-staple-48 GAATTACATTCTAGAGGATCCCGGGTAATCCGCTCACAATT  
cub-staple-49 TGCATGCGATTAAGCTTCGCTATTACGCATTTCCACACAACA  
cub-staple-50 GGTAATACGTTTACGTAAGAGCAACACTACGTTAGTAAATCT  
cub-staple-51 AAACGCACTTACCGGAAACAATGAAATATACACCATCAATAT  
cub-staple-52 ACCCCGGTGAGAGTCTACAAAGGCTATCTCGCAAGCGGTCCA  
cub-staple-53 ATAAGGCCCAATAAACTGAAAAGGTGGCAAATAACCTTAAGAA  
cub-staple-54 AAAAATGAGTTACAGCGTCTTTCCAGAGAATCATCATATTCC  
cub-staple-55 ACCAACGCAGATGAAGAAACCACCAGAATTTAAAATAACGTC

cub-staple-56 TTCGCGTCCATTTCGCCAGCTTTCCGGCAACGACGAGTGTAGA  
cub-staple-57 CTCCGGCTAATTACTAAATAAGAATAAAAATGGTTTAATTTTC  
cub-staple-58 CCTGATACCGAACTCACCGACTTGAGCCGGCCGGAAACGTCG  
cub-staple-59 TAGCTATATAATAACATATATTTTTAAATAGACAGTCAAATAA  
cub-staple-60 TAAATGCGAACCGCCACCCTCAGAGCCAACTGAGTTTCGTTG  
cub-staple-61 CCGGAACGGTCATAGTAGCGCGTTTTTCACGGCTGTCTTTTCCC  
cub-staple-62 ATCGGTGCGGAAGCTGTGTGAAATTGTTCCGAGCTCCAAGCT  
cub-staple-63 TTTAGCGCCACCAGACCCTCAGAGCCGCGAGCCGCGCCACCA  
cub-staple-64 CTGGCTCAAATTTGGGACGAGAAACACCACAATAGTAGTAGCA  
cub-staple-65 AACAAAATTTATCAGACGCTGAGAAGAGCTTAGAAAATCGTC  
cub-staple-66 TTGCGTATTTCCAGTAATTGCGTTGCGCAGATTAAATTTTTG  
cub-staple-67 TCAAAGGGAGATAGCCCTTATAAATCAACCCAGAGGGTAATT  
cub-staple-68 ATAGCCC GCGAAAACAGCCTTTACAGAGCCTGAACAAAGTTA  
cub-staple-69 AAGGGAAAATTTGTGCGGAGATTTGTATCAGCACCAATGAAAC  
cub-staple-70 TAAGCAAGAAACGCTAGCAAACGTAGAAGAAGTGGGATAAAA  
cub-staple-71 TGCTGTATACCACACAACATTATTACAGGGAAGAATTAGTTT  
cub-staple-72 ACGATCTGCCGACATGCTTTTCGAGGTGACTCCAAATTGCGAA  
cub-staple-73 TCAAAGCGCGGATTCCTGACTATTATAGTTCATCAACATTTA  
cub-staple-74 AGAACGGCCAATAGCAAGCCTCCCTCACACTTATCATTCCA  
cub-staple-75 TGGGCGCCCCGTCGTCCTGTAGCCAGCTTCCCGGAAACCAGG  
cub-staple-76 TGCCCGCTTGGGCGTCAGAAAAGCCCCAGTTAAAATTCGCGT  
cub-staple-77 CCAAAGATCACCGTGACCAACTTTGAAACAAGAGTAATCTCG  
cub-staple-78 CATTTTCCGCAAATCAGATATAGAAGGCGGAGGTTTTGAAGG  
cub-staple-79 AACAGTAAAGAGAACAGTACCTTTTACAAATCGCGCAGAGAA  
cub-staple-80 GTCGAGAGCCACCCTCAGACCTAAATTTACGGATAAGTGCC  
cub-staple-81 TGAATTACAAAAGGTCATATGGTTTACCATTGACAAGAACCG  
cub-staple-82 ATTTTTATACCAAATCAGAGCATAAAGCGCAAGGTGGCAACA  
cub-staple-83 GATTATAATAAGTCCAACATGTTTCAGCTAAAAGGTCGTCAGA  
cub-staple-84 ATATTCGTCTGAAACCGTATAAACAGTTATAAGTTTACAGAG  
cub-staple-85 AATTACGTTTTAACTATTCATTGAATCCAGACTGGCAGAGGG  
cub-staple-86 GCAAGGCCTGCAGGTGCGACTAATTTTCTCGGGGGATGTGCT  
cub-staple-87 TACCGCGGTATTAACCAATCAATAATTCGCCTTAAATCAA  
cub-staple-88 CATTGCCTTGATAACCAGGGTGGTTTTTTGAGAGAGTTGCAAC  
cub-staple-89 TGGGATTTTTTTTACGTTGAAAATGTTTCCGAATTTTCTGTA  
cub-staple-90 CCTACCAACAGTAATATAAAGTACCGACAATGCAGAACGCTC  
cub-staple-91 GAGCTAAAGCTCATAACGTTAATATTTTAAAACAGAGGCGGT  
cub-staple-92 ATTTGCCAAAATAGACCGTCTATCAAATGGAGCGGAATTAGA  
cub-staple-93 TATTTTTTTGCCCCACCAGCTGGCCCTTTTTTACATATGT  
cub-staple-94 GAGTAGTATTATACTTTTCGCAAATGGTCTCAATTCTACTAAC  
cub-staple-95 CAGAACCGGGTTGATTAGCGGGGTTTTGTACACCAGTACAAA





hb-staple-10 CCGTAATCGTAAATAATCAGAAAAGCATGATATGATCTACAA  
 hb-staple-11 AGCCGTTAGATTAGCGGGAGGTTTTGAAAAAAGAAATTCTGA  
 hb-staple-12 GCCCGTATAAACTATTCTGAAACATGGCCAGAATTGATGATA  
 hb-staple-13 AATAATGAATAAGGATAAGGGAACCGAATAATAAGCAGAGAG  
 hb-staple-14 AAAAAAAGGCTCGCTTGCTTTCGAGGTTGTCGTTTCAACAGT  
 hb-staple-15 TAAGTGCTGTTTCCCTGAGAAGAGTCCTTTTTTCAAAGGCGAT  
 hb-staple-16 TGAATCTAATGCGTTCATAATACCGACCCACCGGATAAACAG  
 hb-staple-17 TACATAAATCCGCGAAATACGTAATGACCGATTGAAAATACA  
 hb-staple-18 GACGTTATTTATCACAAAAGGAGCCTTTTAATTTTGAACAAC  
 hb-staple-19 AGCATCGGAACGTAAAGACTTTTTTCATTTCTTACATAACCGA  
 hb-staple-20 TAAAGGAGCTCTGTATGGGATTTTGTATAGAAAGTTCACGT  
 hb-staple-21 GGCTTGATTAGGAAGGTAGAAAGATTCAACGTTAAGTCAGGA  
 hb-staple-22 AGCGCCAAAGACAAGGTAAATATTGACAGTATGCAAAGACAC  
 hb-staple-23 TTACCTTGTATCGGGTAAATGAATTTCTATTTTCGGTCTGAAT  
 hb-staple-24 TAGCGACTCAGAGCAGAGCCACCACCGGCGGTTTGTAGCCT  
 hb-staple-25 TCAAATATAATGCTTGGCTTAGAGCTTAACTAATTACCTTGT  
 hb-staple-26 ATGTACCAGCTCAGAACCGCCACCCTCACCCAATAAGTTTTG  
 hb-staple-27 TAGATACATTTCAATAACCTGTTTAGTATTAAGTAGCGGGGT  
 hb-staple-28 AAGGGTGAGAAAAGTCAAATCACCATCACCTCCACCACCAG  
 hb-staple-29 ACGGGTAACTGCTCTGATAAATTGTGTAGCGCGATCTTTGA  
 hb-staple-30 TTCATCACCAACTGACCAACTTTGAAAGTAGGCTGACCGGAT  
 hb-staple-31 CTTTTTTCGGAAGATGATGAAACAAACATTCATTTATCAATA  
 hb-staple-32 CCAGCTTCGACGACCCGTGCATCTGCCATCGGATATAATGGG  
 hb-staple-33 ACGAGCCCCAGGGTGGAGAGGCGGTTTGGTCGTGCTGCCCGC  
 hb-staple-34 TTGTATCATCGCCCATGTTACTTAGCGAAGTTTGAAAGAGGC  
 hb-staple-35 AACATTATTACATACCACATTCAACTCGAGTAGTATGCGATT  
 hb-staple-36 TAAGACGTGTGTGACGTAATCATGGTCAGTCGACTGGTTGGG  
 hb-staple-37 GAGCGGAATTATTCATCAATATAATCGTGGACTTATTAATC  
 hb-staple-38 CCACCCTGAGAGACGGCCGTAAAAATTTTGAGTAAGGTTGAG  
 hb-staple-39 CCACCACAGCCCTCAATTACGAGGCACCAATACTGAGAACCG  
 hb-staple-40 CCGAAATGTGCCGGAGAGGGTAGCTATTGCCTGAGAAACAAG  
 hb-staple-41 TTTCCAGGTTGTAAAGCCTGGGGTGCCTCGCTCACCAGCTGC  
 hb-staple-42 TTATATAAAAATAGTGAATTTATCAAAACGGCTTACTAGAGG  
 hb-staple-43 TAACCTTGCTTCAGAATCCTTGAAAAGGCGAATAACAAAATT  
 hb-staple-44 TCAACAGAACATGTTTCTGTCCAGACGAAATAAGAAGTAATG  
 hb-staple-45 CTTTAAAAAATTGCAGCGGGTCTGAACCATGTAGATAATCG  
 hb-staple-46 CTTTTTTCGCGAGTAGCTCAACATGTAAGCCCGAAGCAAAC  
 hb-staple-47 GGCGCATCGTAAAGTATCGGCCTCAGTGGCCTTATTCTCCGT  
 hb-staple-48 CGAGCTCGAATTAATTGTTATCCGCTGCGATAGTCTGAGAGA  
 hb-staple-49 GTCAATCCTTGCCCAAAGCTGCTCATTTCGACAAGAGCTGACC

hb-staple-50 AAAATCTTCGTAGGAATCATTACCGCGCATCCGGTCGCGAGG  
 hb-staple-51 CGGGAGAAACAAGTTACAAAATCGCGTTGTTTGTGCACGTAA  
 hb-staple-52 AGTTTCAGAGGCTTGATAGTTGCGCCCCGCCTCCCAGAATCA  
 hb-staple-53 TTTGCGGTAGCCTTTAGCGTCAGACTGTCCCCTTACCATCTT  
 hb-staple-54 TGCTGCAATATATTTAAAGAACGCGAGAACTATATTTGCATG  
 hb-staple-55 TCCCAATCCAAATTTTTTGTTTAACGTGACCTAAAATAAGGC  
 hb-staple-56 AATCAACGTAAGTACGAGAAACACCACGAGGCATGAACGGT  
 hb-staple-57 TATACCACGAAAGGTGGCAACATATAAATTTGTCAAAAATTC  
 hb-staple-58 TTCAATTTTCCCTTTGTAAATCGTCGCTTACATAAGAATTAC  
 hb-staple-59 CATTATATTGGGCGGGAAGCATAAAGTTGAGGGGATCATCAA  
 hb-staple-60 GATAACCCACAAAACAATGAAATAGCAAATGAAGGGAGAATT  
 hb-staple-61 CGCAGTCAACCTATAGTTAATGCCCCCTATGGGGTTTAACTG  
 hb-staple-62 AAGGTAAAGTAATCAGCTAATGCAGATATAAAGACATGTAAT  
 hb-staple-63 GAAACAGATGAGAATCGCCATATTTAACTCGAGCCGAATATA  
 hb-staple-64 CGAATAAAAAGTTCCAGTAAGCGTCATACATAAGTTCAGTGCC  
 hb-staple-65 TAAAGGCAAGACAATGACAACAACCATCGGCTTGACCCTCA  
 hb-staple-66 GCCAACGCGCGGGGTTTTTCTTTTCAATTCCACGAGCTAACT  
 hb-staple-67 ATACCCAAAAGATTAAGACTCCTTATATCGCACCGGAAACCA  
 hb-staple-68 ATCACCGGAACCCGCCACCCTCAGAAAGCACCGTTTCATCGG  
 hb-staple-69 ATAGTAAAATGTGTCATAAATATTCAAGGTTTACACCCTCAT  
 hb-staple-70 TAGCAAGGCCGGAATGAAACCATCGAAAAACAGACGTTAATA  
 hb-staple-71 GCTGATTGAACAAGTAGGGTTGAGTGTTTCGGCAAATCCTGTT  
 hb-staple-72 TTAATTCCAGTTTGGCCCTTACCGCATATGTACCTGATAAA  
 hb-staple-73 TAATCTTAGCATAAAAACAGGGAAGCGCCAAAGTCTGAGCGC  
 hb-staple-74 TGATGGTTCCTGGCCCTGAGAGAGTTGCGCGAAAAATCCCTT  
 hb-staple-75 TATCATTCCAAGAAACCAAGTACCGCGCCTGTTATAATATCC  
 hb-staple-76 GCCCTTTCGCCTCTGCGGGGCACCGCTTCCATTCAGAAACGC  
 hb-staple-77 CACCCTCCGGAATCTTAGACTGGATAGCCAAAAGAGGAACCC  
 hb-staple-78 AAActACAACGCGCGTAACGATCTAACAGATACTCGTTTACC  
 hb-staple-79 CTTCTGAATACCAATAACGGATTGCGCTATATACAGATTTTC  
 hb-staple-80 GCCTGTTTAGTATATACAAATCTTACTACAATTCTTTCCAG  
 hb-staple-81 CAAAAGGATAGTTACTGTAGCATTCCACGTAACACGCGAGAG  
 hb-staple-82 TTGAGTACATATCATACAAACAATTGATTAATTTACAAAGA  
 hb-staple-83 CCCCCAGCACCCTACGAAGGCACCAACACACTCAAACAAAG  
 hb-staple-84 TGATACCTGAGGACAGGGTAGCAACGGCGATCGTCAGGGAGT  
 hb-staple-85 CGTTGGGGCTCAACTTTAATCATTGTGATATACCATAAAACG  
 hb-staple-86 TTAATTTGCTTTGAATAATGGAAGGGTGCTGAATATCGCGTT  
 hb-staple-87 CAAAGGGTGGCAATCATCATATTCCTGATTGCGGATAAAAAGT  
 hb-staple-88 CCTCCCGACTTGTTGCTATTTTGCACATCGAGACAAGCAAAT  
 hb-staple-89 AGAGCATAAAGCGTAATACTTTTTCGATTTTCATAACATCCA





hb-bridge-9 AAGATTCAATTTTCATCCTAATTTACGAGAAGAAAATATCAAC  
hb-bridge-10 TCTTTCCTTTTTAGCCGCCGCCAGCATTCCAGAACAGAGCCA  
hb-bridge-11 TCGATGAATTTTTTAGGCAGAGGCATTTAACGCCACCAACGC  
hb-bridge-12 CCGACAATTTTAGGCTATCAGGTCATTTTTGAGATCAACCG  
hb-bridge-13 CATTACCATTTTTAGCCTAATTTGCCAGTACGAGCGTTTATCC  
hb-bridge-14 CTAGAAAAATTTTTTTGTTAAAATTCGCATTGTAAGAAGATT  
hb-bridge-15 CATAATCAAATTTTCAGATATAGAAGGCTTCCAATAGACAAGCA  
hb-bridge-16 TAGCGAATTTTCATTTTCGGTCATAGCAGCGCGTTAATCAG  
hb-bridge-17 TTGACCATTTTTGTTAAATAAGAATAAAGTGTGATAATTTAA  
hb-bridge-18 CATATTATTTATTTTTTTGCTCAGTACCAGGTTAGGATAGGCTGA  
hb-bridge-19 AAGCCTCTTTTTAAAACGACGGCCAGTCCCAGTCGGGGATG  
hb-bridge-20 TGCAAATCTTTTATAAATCATAACAGGCAGTAGCATTTTGGGG  
hb-bridge-21 TCAGACGTTTTTAAAGTTACCAGAAGGAAAGCAGATACCGAA  
hb-bridge-22 GTTGGGATTTTTTTTTAAATGCAATGCCTTAGAACTATTTCA  
hb-bridge-23 GTAACAGTTTTTAACTGAACACCCTGAAATTAGACAATAGCA  
hb-bridge-24 TATCAGAGATTTTCAGGAGTGTACTGGTAATGGCTTTGGAAAG  
hb-bridge-25 CTTTTACATTTTTAGACGACGATAAAAAACATAACCCATAACGC  
hb-bridge-26 ACCAGTACTTTTAAACAGAAATAAAGAAAAATTATTGATTATA  
hb-bridge-27 ACCAGAAGTTTTTTCAGCGGAGTGAGAAAACAACCTCTTTCCA  
hb-bridge-28 AATCTCCATTTTCTTTGCCCGAACGTTACAACCTCGCCAACGT  
hb-bridge-29 ATGAATCGTTTTTAAAAGAATACACTAACTAAAACCCATTAA  
hb-bridge-30 CGGAGATTTTTACATTAATTGCGTTGAATGAGTACAACAT  
hb-bridge-31 CGGGTACTTTTGTACAGACCAGGCGCAAGGACAGGCAGACG  
hb-bridge-32 ATTACCCATTTTCTACCTTTTTAACCTCTCATAGGCTTAGAT

**g. Staple strands of elongated octahedral DNA origami frame**

loct-staple-1 AAAGTACAACGGGTTACTTAGCCGGACTCAGCAATACGTAAT  
loct-staple-2 TACTGCGGAATCTCAGGTCTTACCCTATTCTGGGGTTGATA  
loct-staple-3 ATAGTTGCGCCGTTTTGCGGGATCGTGTTAGCGAGGAATTGC  
loct-staple-4 ATTAAGCAATAAAATACTTTTGCGGGAGTTTCATATTTTCAT  
loct-staple-5 TTTAATGCGCGAAAGATAAAACAGAGCCAGCCAACAGTAAT  
loct-staple-6 TGGGATAGGTCAAGATCGCACTCCAGCGGTTGAAATAGGAAC  
loct-staple-7 GTGAATTACCTTAACGGAACAACATTGGCGCAGGATATTCAT  
loct-staple-8 TAATAAGTTTTAGCCTATTTCCGGAACCTTGATGGGGAACAAGA  
loct-staple-9 TAAGAATAAACAAATCTTACCAGTACCTTATTGGAATAAGT  
loct-staple-10 AACCAATCAATAGTTTTTATTTTCATGCCAACGTAATTCTGT  
loct-staple-11 CGTGGCGAGAAAGTCACGCTGCGCGTCCACCACTCCTCATT  
loct-staple-12 CGGATGGCTTAGTAAAGTACGGTGTCTTTCCGTCGGTGC GG  
loct-staple-13 GAAATTGCGTAGGGAGAAACAATAACGTTATTAGCAATTCAT  
loct-staple-14 ACCACCGGAACCTCAGAGCCGCCACCAAAATCACTTAGCGT

loct-staple-15 CGACGTTGTAAACGGGTACCGAGCTCTATTATAGAGCTTCAA  
loct-staple-16 AGGTCATTGCCTTGTCAATCATATGTGCCTTTAGCCGGAGAC  
loct-staple-17 TAACCGTTGTAGTCCAGAACAATATTTGCGCTGAACAAAATT  
loct-staple-18 CAATAGATAATATAAAATCCTTTGCCCGGCGGTCTCAATCAAT  
loct-staple-19 TCACCAGTGAGAAGCAGGCGAAAATCTCGTAATTTAATTGCG  
loct-staple-20 AAGGTAAATATTTTGGGAATTAGAGCTTTTTAAGAAAACTTT  
loct-staple-21 CCTTTTTAAGAACTGGCATGATTAATATTATAACACCCTG  
loct-staple-22 TCTTACCAACGCGTTACAAAATAAACGGAATCAGAACCTCCC  
loct-staple-23 TTAATTTTCCCTTAGGTCTGAGAGACACCACACTAAACAGGA  
loct-staple-24 TTTTCAGGGATACCACAGACAGCCCTCAGGTAGATCATAACC  
loct-staple-25 ACAGCATGCTCCATAGATTTGTATCATCCCCAGCGAAACGAA  
loct-staple-26 GAAATCGGCCCCCTACGGGGTCAGTGCCTTTTGATCCAACG  
loct-staple-27 AACGGGTCTGAACAAGAAAATAATATCTTATCATTCCAAG  
loct-staple-28 AAAAGCCCTCAGGACGTTGGTGTAGATGGGGAACAGGCCTTC  
loct-staple-29 ATTAATCAGCTTTCATCAACATTAATTTGTTAAAATTTCGC  
loct-staple-30 TACATTTAATAGTACATCCAATAAATCAAAGCTAACCAAAAA  
loct-staple-31 GCCCAATTTTGCCATAACGAGCGTCTTTGCACCCATTAATC  
loct-staple-32 ATAGCGAAATTACGTAGGAATACCACATCAGTACAGTACCGT  
loct-staple-33 GTTGGGATGAAAGAGGACAGATGAACGGAGTAGATCATTAGA  
loct-staple-34 CTTTTTCAAAGAATACTCATCTTTGACCGCCTGATGAAATCC  
loct-staple-35 AAGCCTGCGTGCCAGCTGCATTAATGAAAAGCATAAAGTGTA  
loct-staple-36 TCAGTGATCATCAAGAACTGACCAACTTAGAAAAATCTACGT  
loct-staple-37 TAACAGTACCCTGTAGCCTCAGAGCATATACAGGCGCATCAA  
loct-staple-38 CTAATGCGAATATAAGAATCGCCATATTTACCGCACTCATCG  
loct-staple-39 ATAGCTGTTGCCCCCGGCAACAGCTGAATTGGGCGTCGGGA  
loct-staple-40 GCCGCCATGTAGCGGGAAGGGAAGAAAGAGAGCTTTCTGAAT  
loct-staple-41 GGAATTAATGGAACTACCATATCAAACGTCAGAGTAACAG  
loct-staple-42 TCTGAATTCATCATTTATCATTTTTGCGGTAATACATGAATGG  
loct-staple-43 AGAGGCAATGAGGAAGGGTAGCAACGGCAGGTGTCAAATTCC  
loct-staple-44 CGTTCTATAGGTAATTTTAGAACCCTCAAGGATGAACGGTAA  
loct-staple-45 TTCTACTCGCAAATCAATTCTGCGAACGTGTTGTAATCGGTA  
loct-staple-46 AGGAAAACCAGCAGACTGATAGCCCTAAACAATATAGATAGA  
loct-staple-47 GAGCCGGTCGTAAGAAAGCGGCCAACGCTGATCGTGCTCAAG  
loct-staple-48 AAACAGGAGATAACCCACAAGAATTGAGAGAGAATAACATAA  
loct-staple-49 GTGCATCACAACCCGTCGGATTCTCCGTGGCGCATCGTAACC  
loct-staple-50 CTAAAGTAGGCCGCACAATGACAACAACCTGAATTTAAATCTC  
loct-staple-51 AATCCAACAAAAGAAAGTAAGCAGATAGAATAGCACGCTAAT  
loct-staple-52 TAACGTGAGAATCCGTGAGTGAATAACCACATAGCGATAGCT  
loct-staple-53 GGATTATTGACCTGAATACGTGGCACAGAACATCGTACCGAA  
loct-staple-54 GTACGCCCTTTCTTACAGGGCGCGTACAGAGTCAATAGTGA

loct-staple-55 ATCATTTCGAAAGGAGCGGGAATAGCCCGCGAAAAAGCGTCA  
loct-staple-56 TTAATTGATATAATGCTGTGGAAGCCCGATTAGAGAAGGCGA  
loct-staple-57 ATCATAAACGAACTATGCGATTTTAAGAATGGTTTTGCTCAT  
loct-staple-58 AAGCATCGAGGAAGATATCTTTAGGAGCGAAGTATAAAACAAT  
loct-staple-59 AAAGTATTCAAAAAGTCATAAATATTCAAAAATGTTATCACCG  
loct-staple-60 GCAAGGAACTAGCAGAGAGTCTGGAGCATTTTTGAATTC AAC  
loct-staple-61 ATCAGAGGAAGCGCACGATTTTTTTGTTTACGCAATAATAACG  
loct-staple-62 CACCATTACCACCCGCCTCCCTCAGAGCTAATCAAGCATTTT  
loct-staple-63 TTTGCTAAAAGCGTTTATTTTGTATCGGATACCATATGAAAT  
loct-staple-64 TAATGTGGCTGATAAATTATGCTATTTTCCGCAATGCCTGAG  
loct-staple-65 TAGATTAAATATATTGAGAAGTGTTTTTTGGACGAGCACGTA  
loct-staple-66 CGAGGAAAACGTCAAAAATGAAAATAGCTACAGAGCTAAAGA  
loct-staple-67 ATGTTAGTTATACACCGGAATCATAATTGACCGTGAATTCAT  
loct-staple-68 CAAAAGGGAGGCTTGCCACCCTCAGAACAACCCATAACTACA  
loct-staple-69 AAGATTAGTATTCTAAATCAGATATAGATATATTTTAAATAG  
loct-staple-70 AACCGATTTTATCAGCTTGCTTTCGAGGCATCGCCCACGCAT  
loct-staple-71 CAAAAACGGAGTGTCTTTCCAGACGTTCTGAGGCTTGCAGG  
loct-staple-72 TCGGTTCGAGTAAATGAATTTTCTGTATGGTCACCACGATAGC  
loct-staple-73 CAGACCAAATTAAGTAGCCACCAGAACGGTTGACTTAGTAC  
loct-staple-74 CAGAGGCAAAGAACGGGTTTAGATAAGTATACCAGAAACCTA  
loct-staple-75 GTTTCAGAAGGCTCCAAAAGGAGCCTTTAACAACCTTCAACA  
loct-staple-76 AACCTGTGGGTGCCTGTGAAATTGTTATCAGCAAGCGGTCCA  
loct-staple-77 CAGAAGGAATAAGAGCAAGAAACAATGACCGAACAAAGTTAC  
loct-staple-78 TTTACAGTTAAACACACTAAGCCCAATAAGAGGAGCTTTAC  
loct-staple-79 GTAGGGCGCAAGCCATCGGCTGTCTTTCCCATCCTGTTACG  
loct-staple-80 AAGTTTGTACATCGATTTTTCAGGTTTAATTATTTGTTATACT  
loct-staple-81 ACTTGCCATAATCAACAGTACATAAATCAGATTTCTATTAC  
loct-staple-82 TAATATTGTCTAAAGTTATGAGCGAGTATGATGAAAGCAACC  
loct-staple-83 ATGGTTTACATATAAGAAAATACATACAAACTGTTTAGTATC  
loct-staple-84 CGGTCATTAATCAGGCAAGGCCGGAACGGAACCGCTCAGAT  
loct-staple-85 ACCCTTCTTACATTTGGAAATACCTACAATAAAAACCATTAC  
loct-staple-86 CAGTTCAGAGAAGGATTAGTTTCGTCACTCAACTAATAACGC  
loct-staple-87 GGTCAGGAAAGACTATCAAAAAGATTAACACCTGCAGGTCTGA  
loct-staple-88 TGAGCAAAATGGAAGTGAGGCCACCGAGTTAGTAACTATCGG  
loct-staple-89 AGAGTTGCCGCTCACAATTCACACAACCTTTTGACCTGAAAT  
loct-staple-90 AGCACCGAGCCCCCTTGCCATCTTTTACGCCACCCACCCCT  
loct-staple-91 CTTTTTTAAGAAGACAAAATCGCGCAGAACTCAAATAACATC  
loct-staple-92 AGGAATTACCTTGCACTGCCACGCTGAGACTTTACTAGACGT  
loct-staple-93 CCAGTCAGAGTAGTAAATTGGGCTTGAGACTGGCTCATTATA  
loct-staple-94 GCAAAGCGGATCCCACGACGGCCAGTGCGGGTAACTCCAACA

loct-staple-95 AACACTGCAGAACCTTGCAAAAGAAGTTTAGATACATGCAAA  
loct-staple-96 CCACCCTAGGATTAGCGGGGTTTTGCTCGAGGTTTAGGGGT  
loct-staple-97 GCTGAGATATGGTTGCTTTAGTAGAAGAGGCGAATAATTACC  
loct-staple-98 AGTTTGAAAGCAAATATTTAAATTGTAAAGCCAGCAAATCTA  
loct-staple-99 GCTTAATAAAATCATAGAATCCTTGAAATTGCTTCAGGAACG  
loct-staple-100 TCAAAGGGAGATAGCCCTTATAAATCAAAGGCCGTATAAAC  
loct-staple-101 TTCTGGTATGCAACAGCTTAATTGCTGACTCCTTTGGCGAAA  
loct-staple-102 AATAAGAAGAACGCGCCTGTTTATCAACATTTTCGAGCCAGT  
loct-staple-103 CTTAGGTGAGCCATGACGGAAATTATTCGCGACATCATCTTC  
loct-staple-104 AAATACCACTAGAAAAAGCTGCTGATGCAATTTAACCAAAGA  
loct-staple-105 TGAATACGGTAATACAATACTTCTTTGATAAAAGAGAATTAC  
loct-staple-106 TGACCTAAAATCCATATAACTATATGTATATTATCACCGTCA  
loct-staple-107 CTGTAGCTTTTGTTCAGGAAGATTGTATGGGGACGACGACAG  
loct-staple-108 GGGGGATCAGGCTGACCAGGCAAAGCGCGAAGCTCAACATGT  
loct-staple-109 ACACCGCCTCGTATCATTTGAGGATTTAACTAACAAGTTGAA  
loct-staple-110 CTGGCCCGCGGGGAGAGGGCGTTTGCGTTTGCCCTTCACCGC  
loct-staple-111 TACTCAGAGTACCACTGAGACTCCTCAAGAAAACGAGAATGA  
loct-staple-112 AATAGTATTGAATCCCCCTCAAATGCTTTTGCCAGAGTACCG  
loct-staple-113 CAAAAGGATTAAGGTGAAAAGGTGGCAACCAGCGTGGTTTG  
loct-staple-114 TTACCGTTTGGCCTCAGGAGGTTGAGGCAAGCGCTAGGGCGC  
loct-staple-115 TACATGGTTGAGTAACAGTGTGACGATCCAGTAACCGTCT  
loct-staple-116 TTAAGTTCAAGCTTGCATGTTGCCATTGTGCTGCAGTACCT  
loct-staple-117 TTATCCGGTATGCCGGAGAGGGTAGCTAAACAAGAGAATCGC  
loct-staple-118 CTGACCTATAAGGCTTGCCCTGACGAGAGGGCGCATAGGCTGG  
loct-staple-119 AACCAAGTAACAACGCCAACATGTAATTAACAAAGAAGGAGC  
loct-staple-120 CATCAGTTAGCATTGCAAGCCCAATAGGCGCCACCAACCAAA  
loct-staple-121 AGTTAATGCAAAATGGTTGAGTGTGTTTCGTGGACTGATACA  
loct-staple-122 GAATACCATAAGAAATTAGACGGGAGAAAATTGAGATAGCTA  
loct-staple-123 GCGACCTCGGAACGAGTTTCCATTAAACCAACCTAATTATAC  
loct-staple-124 TATCGGCCCAAAAAAATCAGCTCATTTTCGCGTCTAACGGCG  
loct-staple-125 TCGTAAATAAAAAATAGATTCAAAGGGTATATGATGAGATCT  
loct-staple-126 CATTATGTGATTCCGGTCAATAACCTGTAAAGGTGAAGGCAA  
loct-staple-127 AGAACAATTAATTGAAGTACCGACAAAAACAACATAATTTA  
loct-staple-128 ATATGCGCAAACGTAAAGAAACGCAAAGAATAGAATGATAAA  
loct-staple-129 CCGACTTTGGGTTAATCGCAAGACAAAGTTAATTTCAACCG  
loct-staple-130 ACGCCTGTGAGATTAGGCATAGTAAGAGCGATAAACTCAGAG  
loct-staple-131 CGCTGGTTTTTCTGTAATGAGTGAGCTACTTTCCAGCCAGGG  
loct-staple-132 CGAACCAACGCTCAGGCAGATTCACCAGCCAACAGTTTTGAA  
loct-staple-133 TAATAAAGGGAACCGAGTAATCTTGACAACAAAGCAATTTCA  
loct-staple-134 CCTTGCTCAAGTTATGATGAAACAAACATTCATTTGTCTGTC

|                 |                                                                                       |
|-----------------|---------------------------------------------------------------------------------------|
| loct-staple-135 | GAGTTAATTTGTCGAGAATAGAAAGGAAACGTTGACTTAAAC                                            |
| loct-staple-136 | TGGCAAGGCATTGATGATATTCACAAACCGCAGTCGACGGGG                                            |
| loct-staple-137 | TCGACAACCTGCAACTGAACCTCAAATATAATCAACACTAATA                                           |
| loct-staple-138 | AGCCTAAAGCAAGCAAGAACGCGAGGCGTGAAGCCGCTACAA                                            |
| loct-staple-139 | CAGAGCCACCATTATAGCGACAGAATCATTTCATCGAATCACC                                           |
| loct-staple-140 | TACCTTTAGTAACAATTCTGATTATCAGTTTGGACACGTAA                                             |
| loct-staple-141 | CTCTAGAGGATTGCTCAAATATCGCGTTAGCAAACGCCAGGG                                            |
| loct-staple-142 | TTTAAATGCCGGAACGCAACTGTTGGGAGCCAGCTTGATAAG                                            |
| loct-staple-143 | ATTTATCGCGCCGCGTTAGAATCAGAGTTTACTGTAAAT                                               |
| loct-staple-144 | CCATAAATAAGAGGGGCGGATAAGTGCCTAGGTGTTAGACTG                                            |
| loct-capture-1  | ATCCATCACTTCATACTCTACGTTGTTGTTGTTGTTGTTAGCCTAAAGCAA<br>GCAAGAACGCGAGGCGTGAAGCCGCTACAA |
| loct-capture-2  | ATCCATCACTTCATACTCTACGTTGTTGTTGTTGTTGTTTCGTAAATAAAA<br>ATAGATTCAAAAGGGTATATGATGAGATCT |
| loct-capture-3  | ATCCATCACTTCATACTCTACGTTGTTGTTGTTGTTGTTATATGCGCAAAC<br>GTAAAGAAACGCAAAGAATAGAATGATAAA |
| loct-capture-4  | ATCCATCACTTCATACTCTACGTTGTTGTTGTTGTTGTTCCGACTTTGGGTT<br>AATCGCAAGACAAAGTTAATTTTCAACCG |
| loct-capture-5  | ATCCATCACTTCATACTCTACGTTGTTGTTGTTGTTGTTAGTTAATGCAAA<br>ATGGTTGAGTGTTCGTGGACTGATACA    |
| loct-capture-6  | ATCCATCACTTCATACTCTACGTTGTTGTTGTTGTTGTTTGGCAAGGCATT<br>GATGATATTCACAAACCGCAGTCGACGGGG |
| loct-capture-7  | ATCCATCACTTCATACTCTACGTTGTTGTTGTTGTTGTTCTCTAGAGGATT<br>GCTCAAATATCGCGTTAGCAAACGCCAGGG |
| loct-capture-8  | ATCCATCACTTCATACTCTACGTTGTTGTTGTTGTTGTTTTTAAATGCCGG<br>AACGCAACTGTTGGGAGCCAGCTTGATAAG |

Note: In order to position one gold nanoparticle in the body center of the elongated octahedral frame, ‘ATCCATCACTTCATACTCTACGTTGTTGTTGTTGTTGTT’ sequence was added in the blue marked staple DNA strands.

#### f. Bridging strands of the binary system

|              |                                               |
|--------------|-----------------------------------------------|
| bs-bridge-1  | CGTCCAATTTTTTTCAGAACCGCCACCCTCTCAGAGTATTAGC   |
| bs-bridge-2  | CCAGTCATTTTAGCACCATTACCATTACAGCAAATGACGGA     |
| bs-bridge-3  | GTTTTTCTTTTTTTTTAAAGGTGGCAACATAGTAGAAAATAATAA |
| bs-bridge-4  | TGTAAGGTTTTTAAGTTTTAACGGGGTCGGAGTGTAGAATGG    |
| bs-bridge-5  | CCGAAGCTTTTGCTTTGAGGACTAAAGAGCAACGGGGAGTT     |
| bs-bridge-6  | TATCCTGAATTTTTAACCTGTTTAGCTATTTTCGCATTCATTC   |
| bs-bridge-7  | GCATGTAGATTTTTTGCCTATTGGGCGCCCGCGGGGTGCGCTC   |
| bs-bridge-8  | GCGTTAAATTTTGTCCACTATTAAAGAACCAGTTTTGGTTCC    |
| bs-bridge-9  | GGGAGGGTTTTGTTAAATTCGCATTATAAACGTAAACTAG      |
| bs-bridge-10 | CGCTATTAATTTTCTCCAGCCAGCTTTCCCTCAGGACGTTGG    |
| bs-bridge-11 | GGCGAATTTTCAGGTCGACTCTAGAGCAAGCTTCAAGGCG      |
| bs-bridge-12 | CAGAGCCTTTTTGTAAAGATTCAAAGGCCTGAGTTGACCCT     |

bs-bridge-13 AGGCTATCTTTTGTCTAGAGGGTAATTGAGAACACCAAATAG  
 bs-bridge-14 GACCGTAATTTTATTGCGTAGATTTTCAAACAGATTGTTTG  
 bs-bridge-15 TCATTTTGTTTTTTCACGTTGAAAATCTTGCGAATGGGATT  
 bs-bridge-16 ATTAGCAAATTTTCAGAGCCACCACCCTCTCAGAACTCGAGAG  
 bs-bridge-17 CAGAAATAAATTTTATTTAAGAAGTGGCTTGAATTATCAGTGA  
 bs-bridge-18 AGCCGTTTTTGGTAATAGTAAAATGTAAGTTTTACTAT  
 bs-bridge-19 GCTATTAGTCTTTTTCAAAGCGAACCAGACCGTTTTATATAGTC  
 bs-bridge-20 CGCAAATTTTTAAGGGAACCGAAGTGAAGCAGACGGTATCAT  
 bs-bridge-21 GCGAAACTTTTGATAAGTCCTGAACAAGTGTAAAGAGAA  
 bs-bridge-22 CTTTAATCATTTTTTAGGCGTTAAATAAGAAGACCGTGTGCAAG  
 bs-bridge-23 ACCCTCATTTTGTAAATCGTCGCTATTGAATAACTCAAGAA  
 bs-bridge-24 TGATACCGTTTTAAGCCTTAAATCAAGACTTGCGGAGCAAAT  
 bs-bridge-25 AGGTCATTTTTTAACAAAGTCAGAGGGTTAACTGTTATCCC  
 bs-bridge-26 TTGTTATCCTTTTGACTTGCGGGAGGTTTTTTAGCTTACCGC  
 bs-bridge-27 CCGCCTTTTTCCAGACGACGACAATAGGTAAAGCTCAACA  
 bs-bridge-28 GGTGAATTTTTTTTTATTTTGTCAATCACACCACACGCAGT  
 bs-bridge-29 CCAGCATTTTTTAAGTATAGCCCGAAGTCGAGAAAACATG  
 bs-bridge-30 GTAGCGATTTTAGCGAACCAGACCGGATTAATTCGTCAGAA  
 bs-bridge-31 AATAGAAAATTTTTTGTGCTCACTGCCCAGTCAACATGGTC  
 bs-bridge-32 AAACAATGATTTTGTCCACTATTAAGAACCAGTTTTGGTTCC  
 bs-bridge-33 CTATTATTCTTTTTAGTCAAATCACCATCAGAGAAAGTTTCAAC  
 bs-bridge-34 GTCTTTCCTTTTGCCATCAAAAATAATTTTAACTAATCAG  
 bs-bridge-35 ACATTATCATTTTTGCCTCTTCGCTATTACAGGGCGAGCACCGC  
 bs-bridge-36 CAACGCCTTTTTTGGGGCGGAGCTGATTAGCTATTCCATA  
 bs-bridge-37 CTGTAGCCTTTTTCAAATATATTTTAGAACGCGACCTCCGG  
 bs-bridge-38 TGCGCATTTTGGCCGATTAAAGGGATCGGGAGCCCCGCCG  
 bs-bridge-39 AACATCCATTTAAGCCAGAATGGAAAGAAATAAACAGAGCC  
 bs-bridge-40 CGGAGAGTTTTCAGACTGTAGCGGTTAGTTTGGCCAGTAG  
 bs-bridge-41 CATTCCAAGTTTTGCCACTACGAAGGCACGGGTAAAGCGAAAG  
 bs-bridge-42 GTATAAAGCTTTTTACCCAAATCAACGTAAGAACCAGCGTCA  
 bs-bridge-43 AGTGAATTTTTTCTCGTTTACCAGACGACAACACTAAAGATT  
 bs-bridge-44 ATTCGCCTTTTGAATAATAATTTTTTCCAATAATAACGAT  
 bs-bridge-45 ACAGGTAGTTTCAATATAATCCTGATTGATGATGATTTTAA  
 bs-bridge-46 TCCCCTTTTATCTGGTCAGTTGGCACAAACCCAGTATTA  
 bs-bridge-47 CCAACCTATTTTAAAAGGGACATTCTGGTCACACGTTGCAAC  
 bs-bridge-48 GGCTGACTTTTAATTACATTTAACAATTCAAGAAATTGCTT

g. Staple strands of anisotropy control

vex-capture-1 ATCCATCACTTCATACTATGACCACTCGTTTGGCTTTTGCAAAGTTAGACT  
 ATATTCA

|               |                                                                 |
|---------------|-----------------------------------------------------------------|
| vex-capture-2 | ATCCATCACTTCATACTCGATTATAAGCGGAGACTTCAAATATCGCGGAAG<br>CCTACGAA |
| vex-capture-3 | ATCCATCACTTCATACTACATAACTTGCCCTAACTTTAATCATTGCATTATA<br>ACAACAT |
| vex-capture-4 | ATCCATCACTTCATACTGATATTCTAAATTGAGCCGGAACGAGGCCCAACT<br>TGGCGCAT |
| vex-capture-5 | ATCCATCACTTCATACCATAACCTAAATCAACAGTTCAGAAAACGTCATAA<br>GGATAGC  |
| vex-capture-6 | ATCCATCACTTCATACAGAAGCAACCAAGCCAAAAGAATACACTAATGCC<br>AAAACCTCC |
| vex-capture-7 | ATCCATCACTTCATACATAAGGCGCCAAAAGTTGAGATTTAGGATAACGGA<br>CCAGTCA  |
| vex-capture-8 | ATCCATCACTTCATACCGCCTGAATTACCCTAATCTTGACAAGACAGACCA<br>TGAAAGA  |
| fc-staple-1   | CGCCTGAATTACCCTAATCTT                                           |
| fc-staple-2   | CAGCCTTGGTTTTGTATTAAG                                           |
| fc-staple-3   | GTTTGCCTATTCACAGGCAGG                                           |
| fc-staple-4   | AGCCGAAAGTCTCTCTTTTGA                                           |
| fc-staple-5   | ACATAACTTGCCCTAACTTTA                                           |
| fc-staple-6   | TGTCGTCATAAGTACAGAACC                                           |
| fc-capture-1  | ATCCATCACTTCATACTTCAGACGCCACCACACCACC                           |
| fc-capture-2  | ATCCATCACTTCATACTATCATTGCATTATAACAACAT                          |
| fc-capture-3  | ATCCATCACTTCATACTGACAAGACAGACCATGAAAGA                          |
| fc-capture-4  | ATCCATCACTTCATACTGCCACCCATTTTCACAGTACA                          |
| fc-capture-5  | ATCCATCACTTCATACTTGATACAAGTGCCTTAAGAGC                          |
| fc-capture-6  | ATCCATCACTTCATACTAGGCTGACTGCCTATATCAGA                          |

Note: In order to position one gold nanoparticle near a vertex of the octahedral frame, ‘ATCCATCACTTCATACT’ sequence or ‘ATCCATCACTTCATAC’ sequence was added in the red marked staple DNA strands. In order to position one gold nanoparticle in the center of a triangular face of the octahedral frame, ‘ATCCATCACTTCATACT’ sequence was added in the green marked staple DNA strands.

#### h. Modified DNA sequence attached on gold nanoparticles

|         |                                      |
|---------|--------------------------------------|
| ThioM-1 | GAAGTGATGGATGAT-SH                   |
| ThioM-2 | GTAGAGTATGAAGTGATGGATGATGATGATGAT-SH |



Figures S1-S35

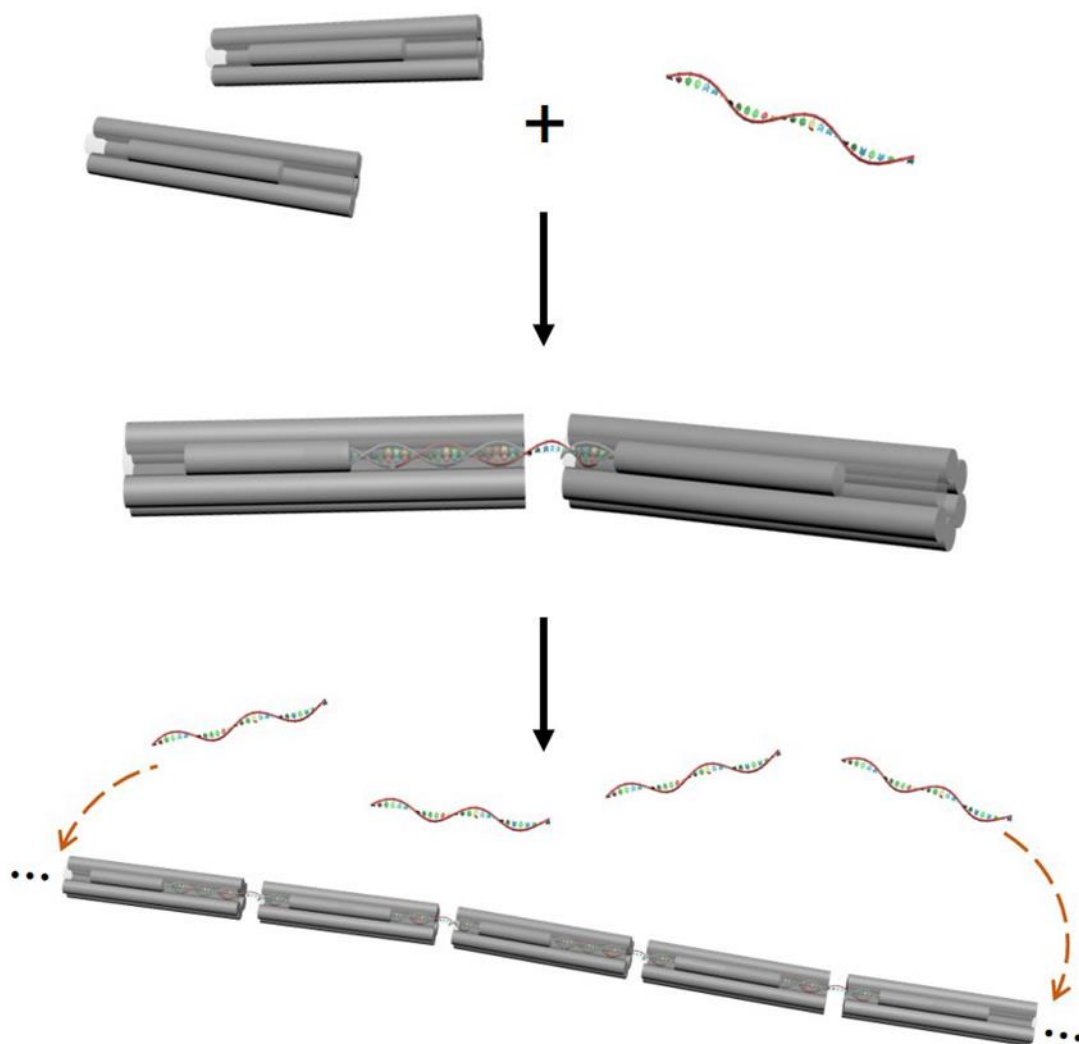

**Figure S1.** Schematics of the bridge pattern for a six-helix rod-shape model. Hybridization regions are designed inside the two ends of rods. Bridging strands hybridize with two adjacent rods to form a DNA bridge and further expand into a one-dimensional linear structure.

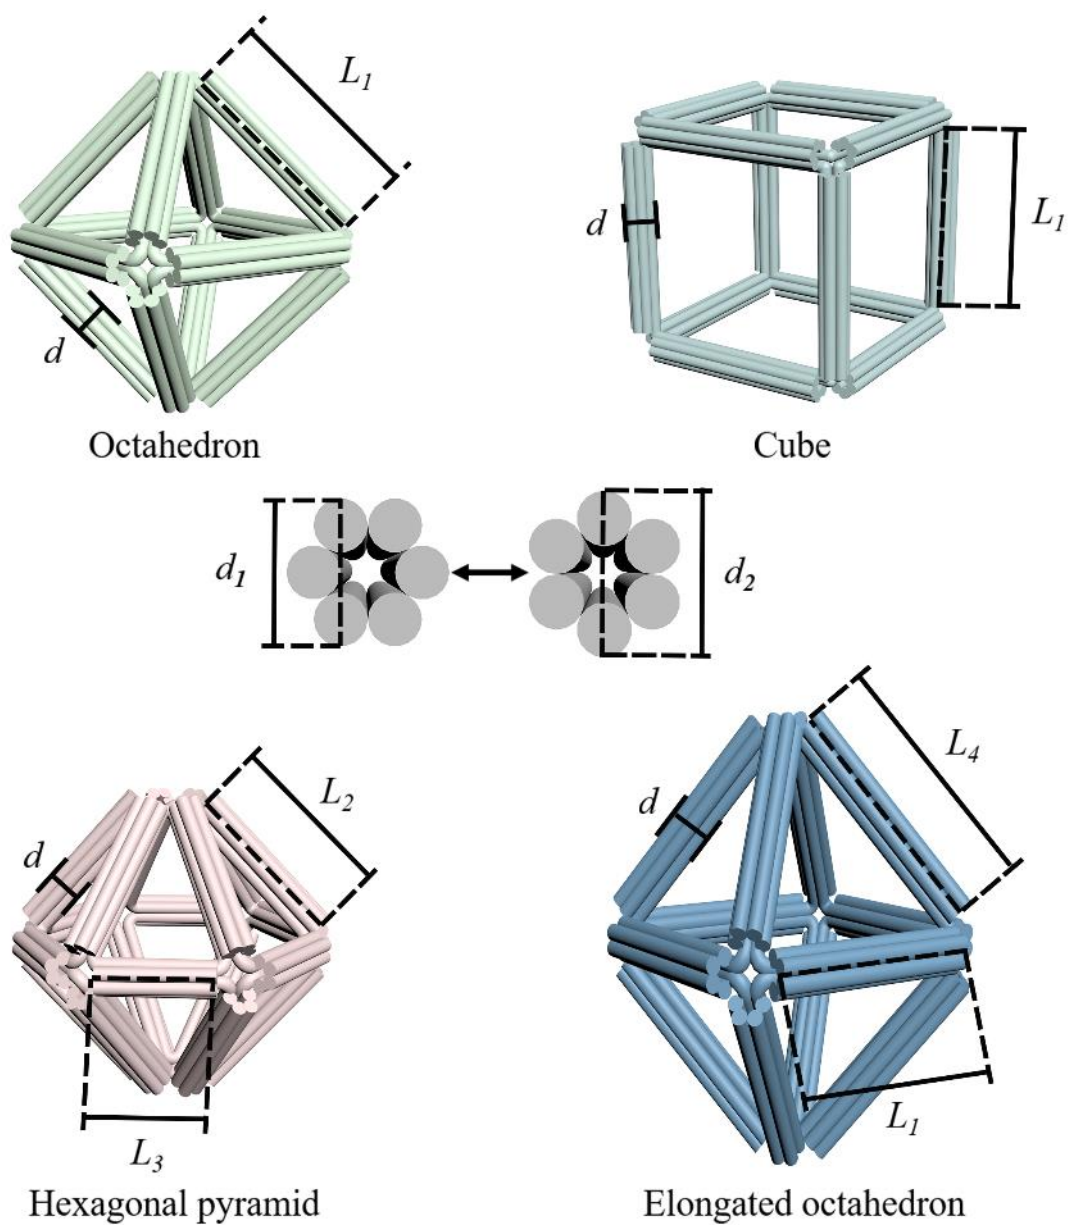

**Figure S2.** Geometric models for the four polyhedral DNA origami frames are octahedron, cube, hexagonal bipyramid, and elongated octahedron.  $d_1$ ,  $d_2$ ,  $L_1$ ,  $L_2$ ,  $L_3$  and  $L_4$  represent the width and length of the edges and their values are as follows:  $d_1 = 5.5$  nm;  $d_2 = 6.0$  nm;  $L_1 = 29.9$  nm;  $L_2 = 22.8$  nm;  $L_3 = 15.7$  nm;  $L_4 = 37.1$  nm.

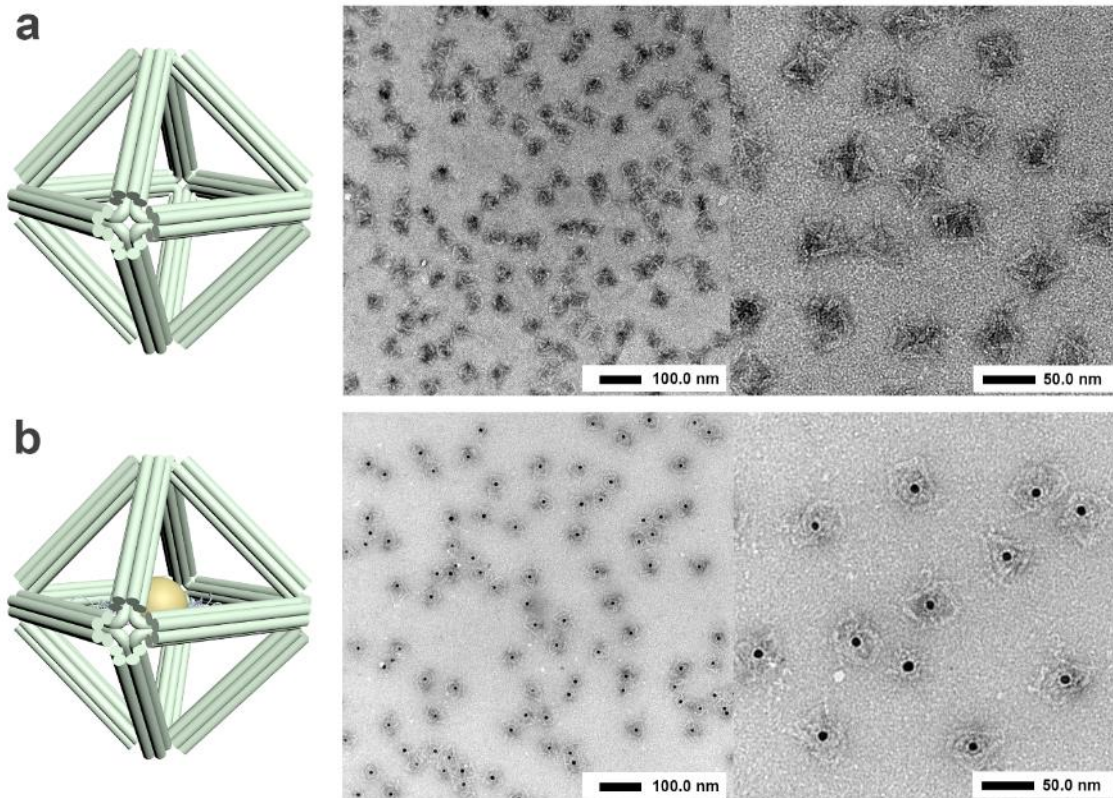

**Figure S3.** a) Representative negative-stained TEM images of octahedral DNA origami frames.  
b) Representative negative-stained TEM images of AuNP-octahedron monomers.  
Corresponding schematics are shown on the left.

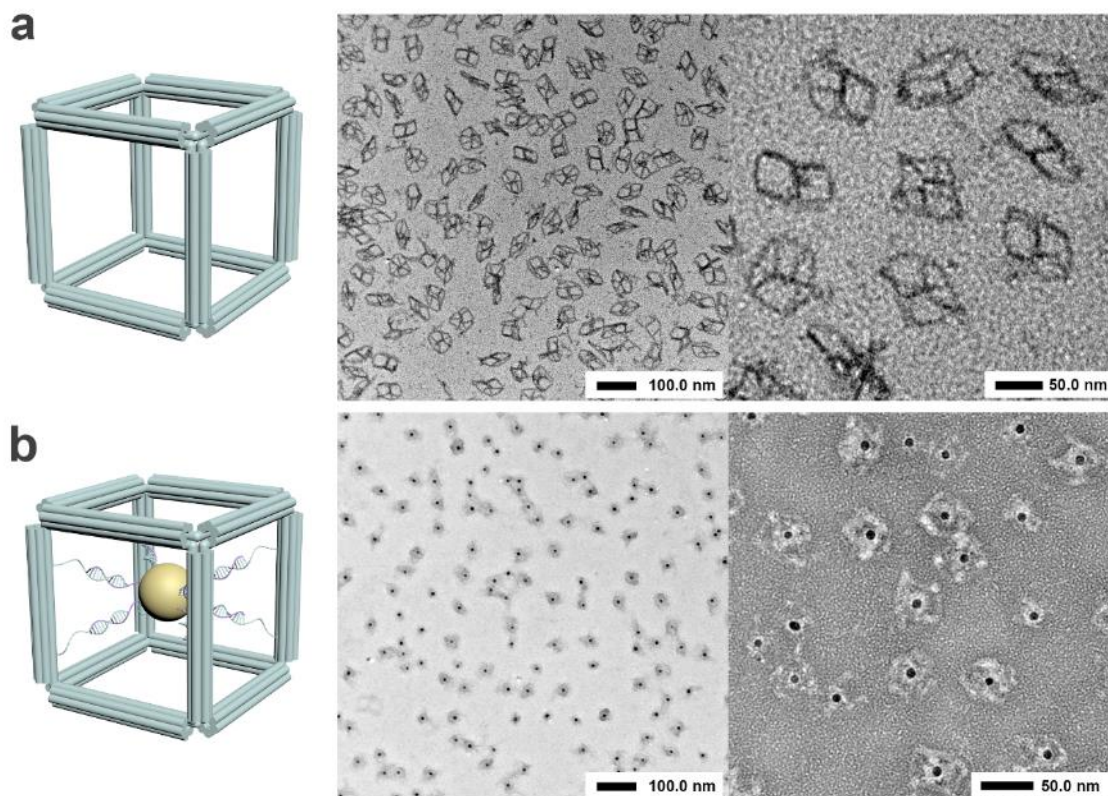

**Figure S4.** a) Representative negative-stained TEM images of cubic DNA origami frames. b) Representative negative-stained TEM images of AuNP-cube monomers. Corresponding schematics are shown on the left.

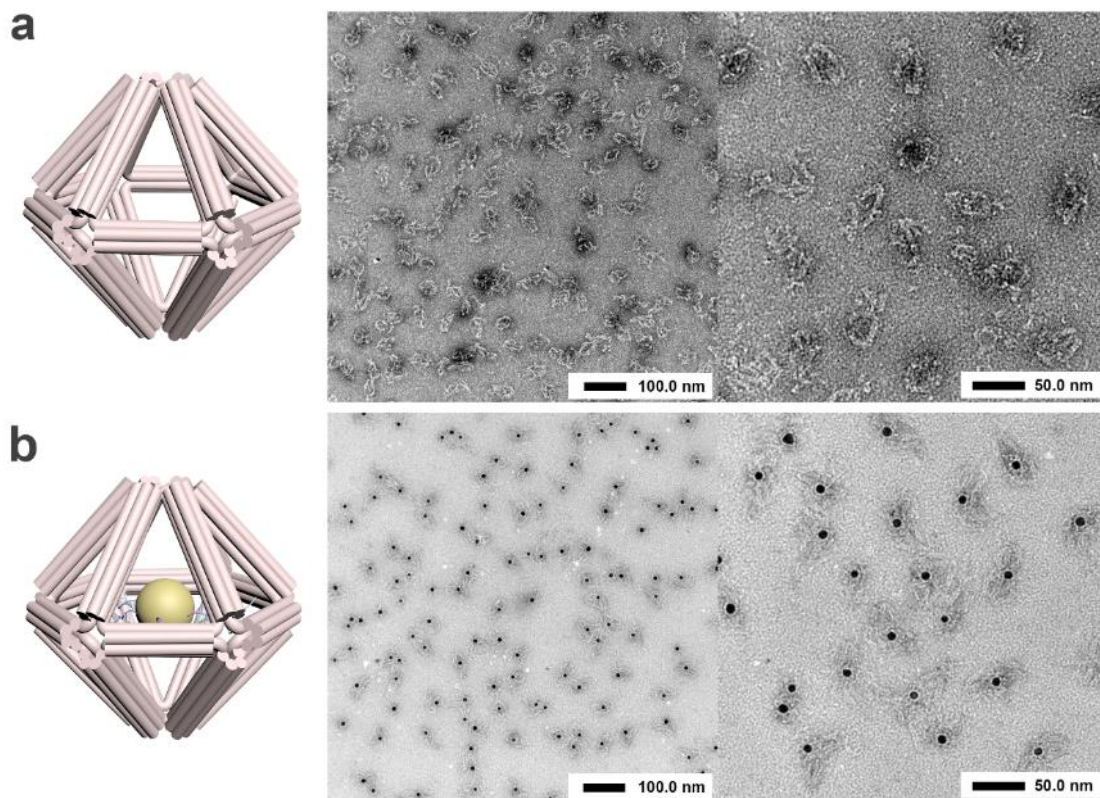

**Figure S5.** a) Representative negative-stained TEM images of hexagonal bipyramid (HB) DNA origami frames. b) Representative negative-stained TEM images of AuNP-HB monomers. Corresponding schematics are shown on the left.

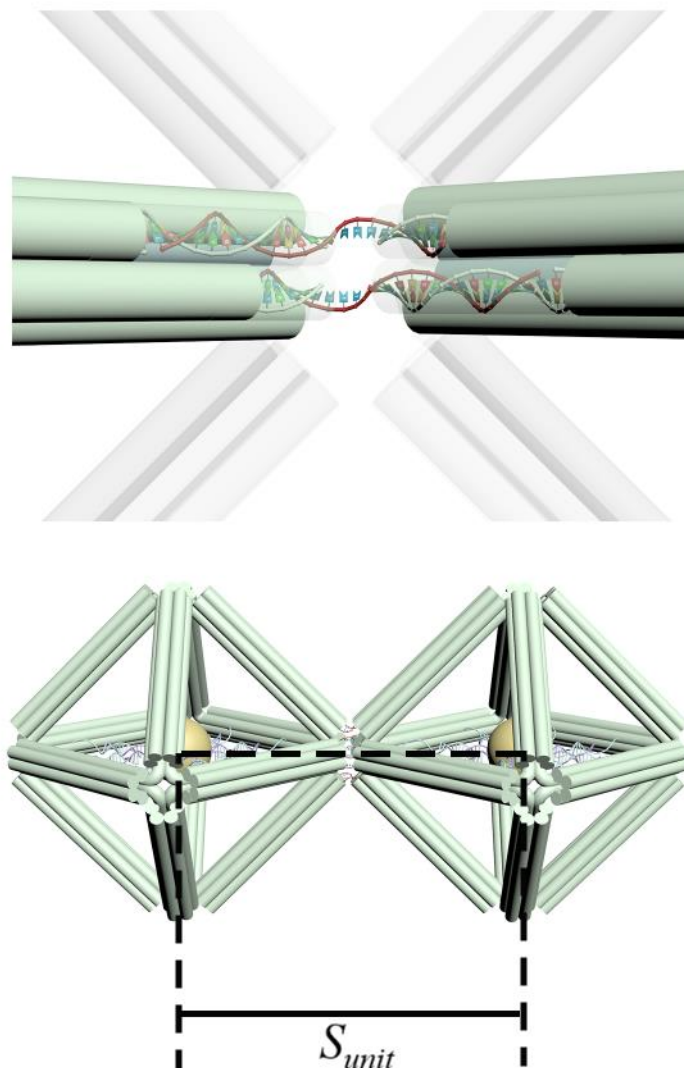

**Figure S6.** The magnified schematics of the bridge pattern for octahedral frames at vertex junctions.  $S_{unit}$  represents the distance between the body centers of adjacent frames in equivalent crystallographic axis directions.

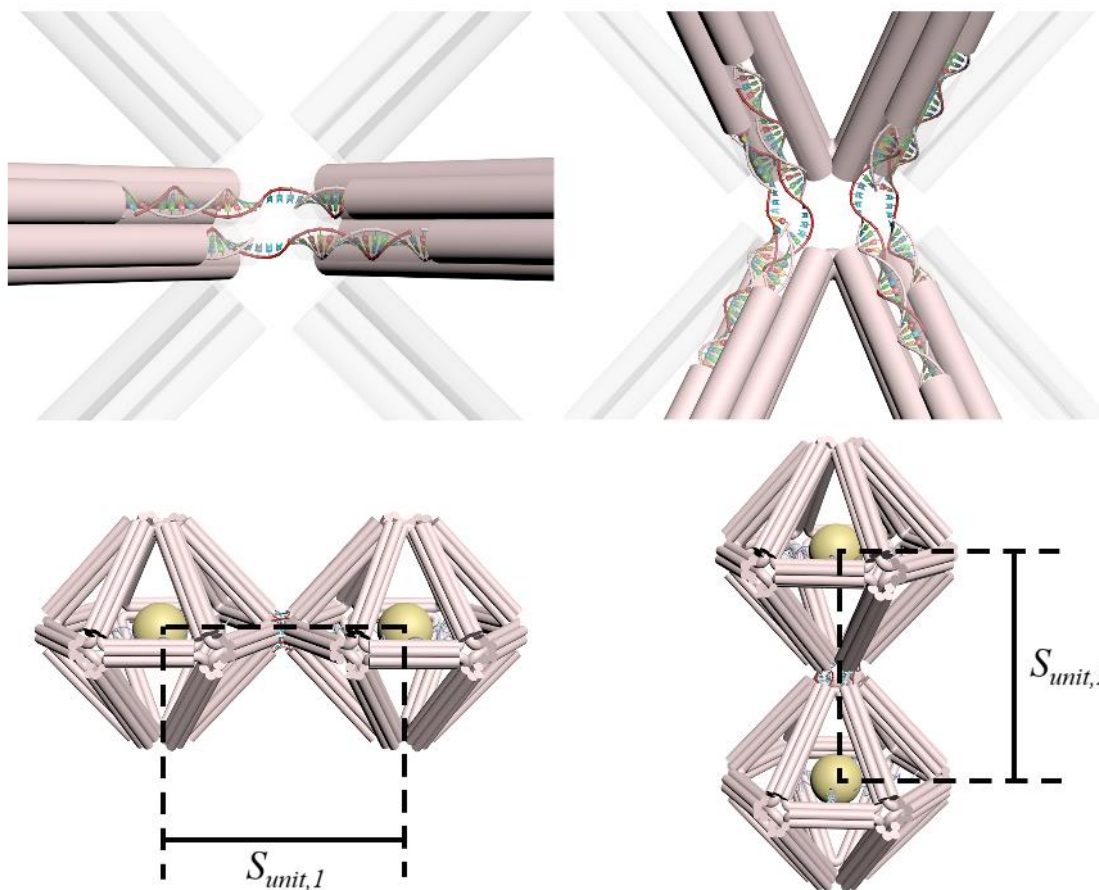

**Figure S7.** The magnified schematics of the bridge pattern for hexagonal bipyramid frames at vertex junctions.  $S_{unit,1}$  and  $S_{unit,2}$  respectively represents the distance between the body centers of adjacent frames in non-identical crystallographic axis directions.

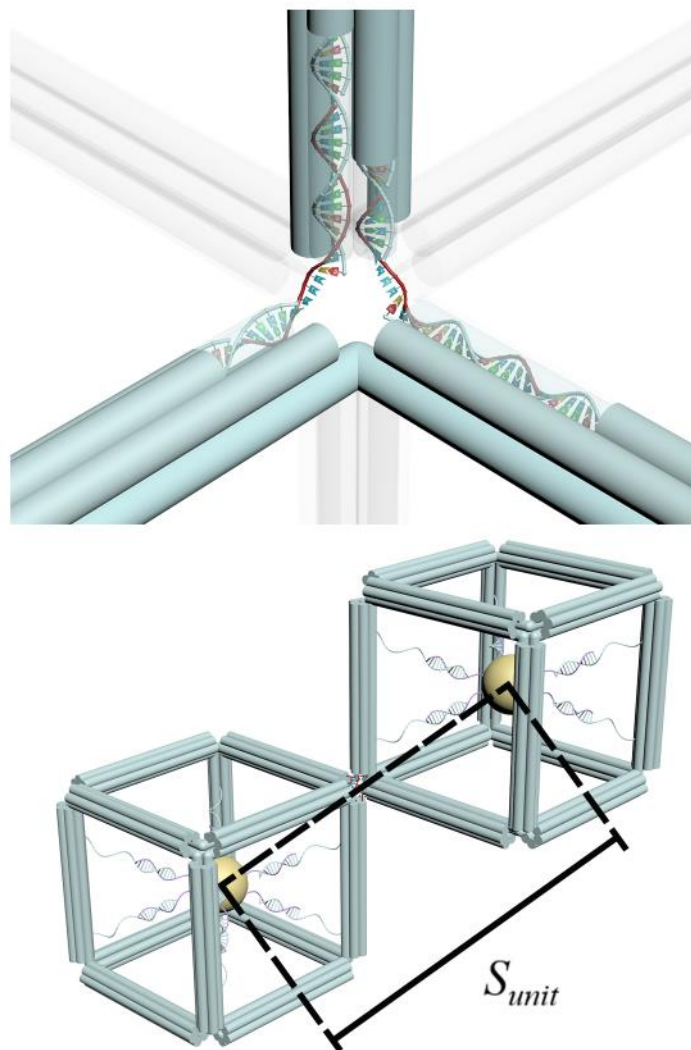

**Figure S8.** The magnified schematics of the bridge pattern for cubic frames at vertex junctions.  $S_{unit}$  represents the distance between the body centers of adjacent frames in equivalent crystallographic axis directions.



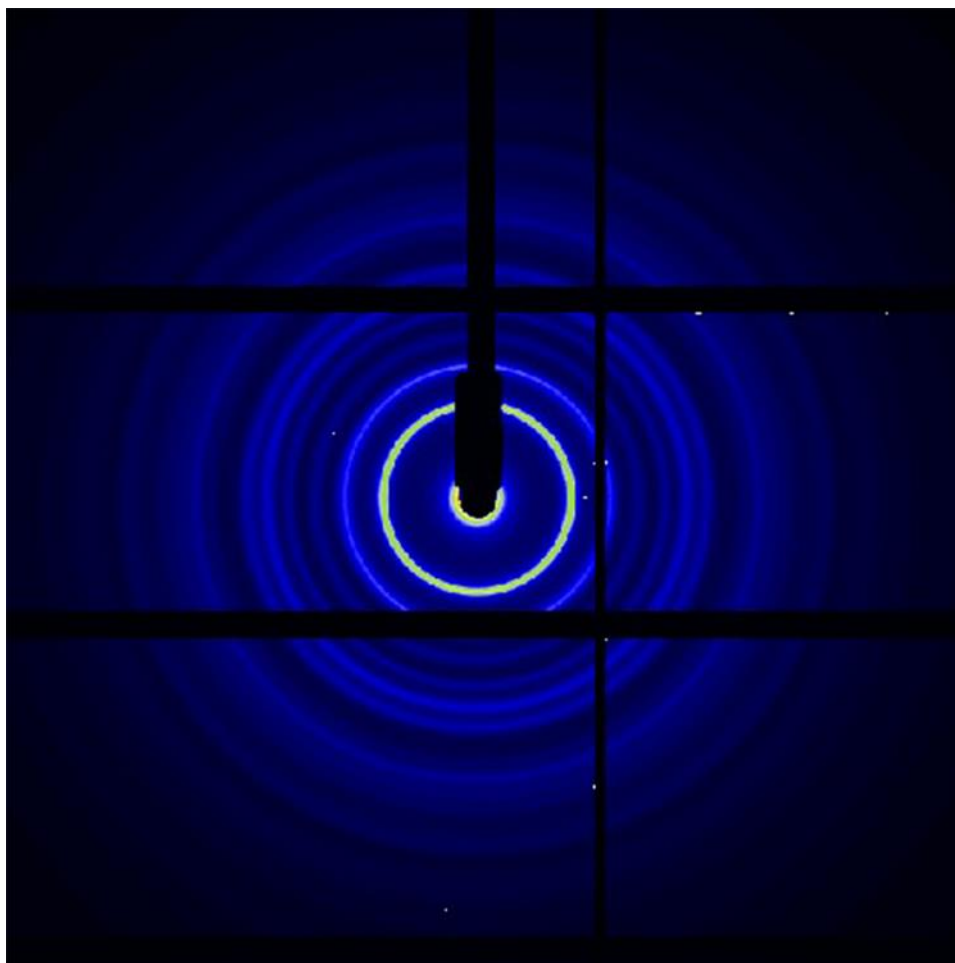

**Figure S9.** 2D pattern of the AuNP lattice formed by octahedral frames measured by SAXS.

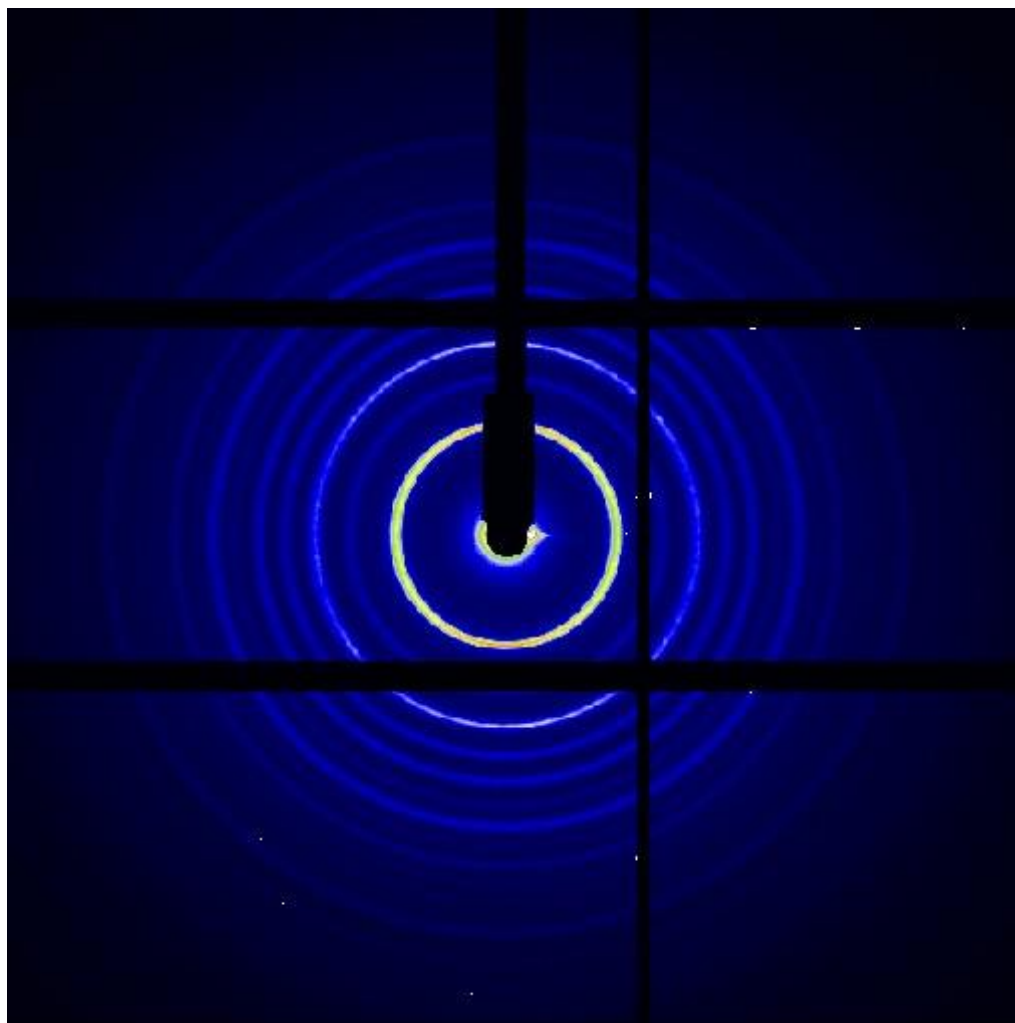

**Figure S10.** 2D pattern of the AuNP lattice formed by cubic frames measured by SAXS.

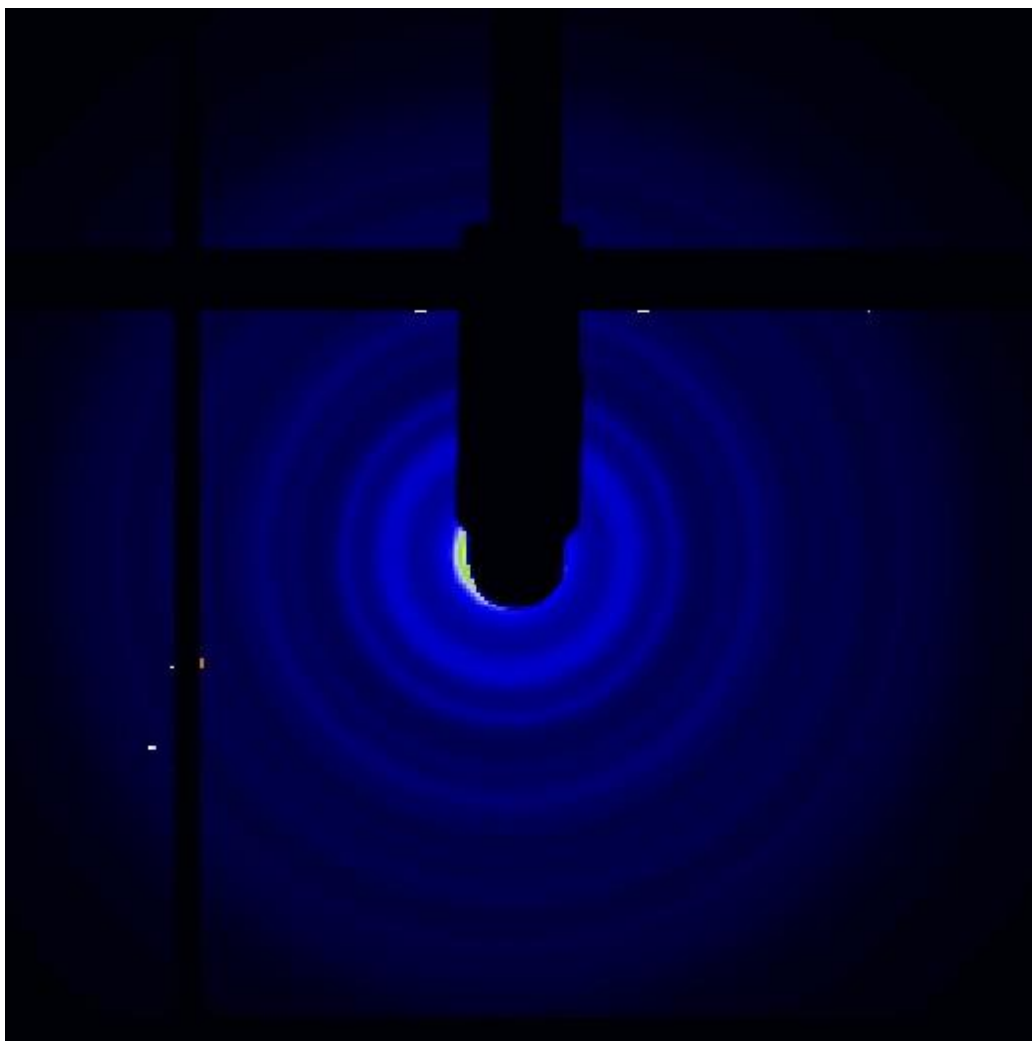

**Figure S11.** 2D pattern of the AuNP lattice formed by hexagonal bipyramid frames measured by SAXS.

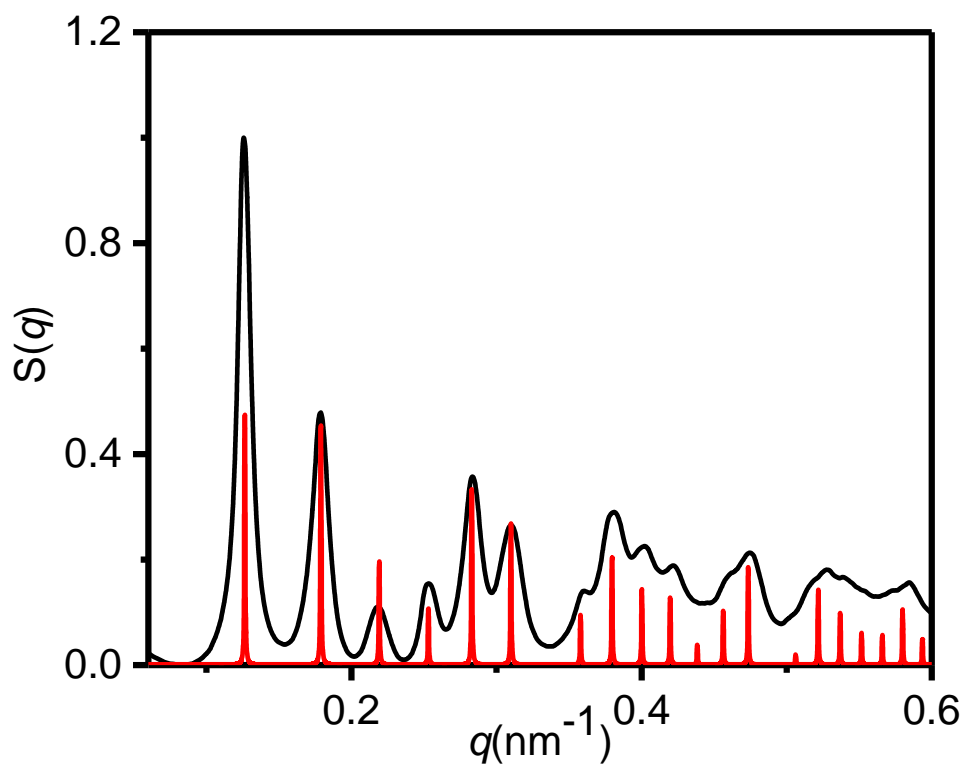

**Figure S12.** Enlargement of structure factor result for the simple cubic lattice shown in Figure 2d: black curve for the experimental data and red curve for the model.

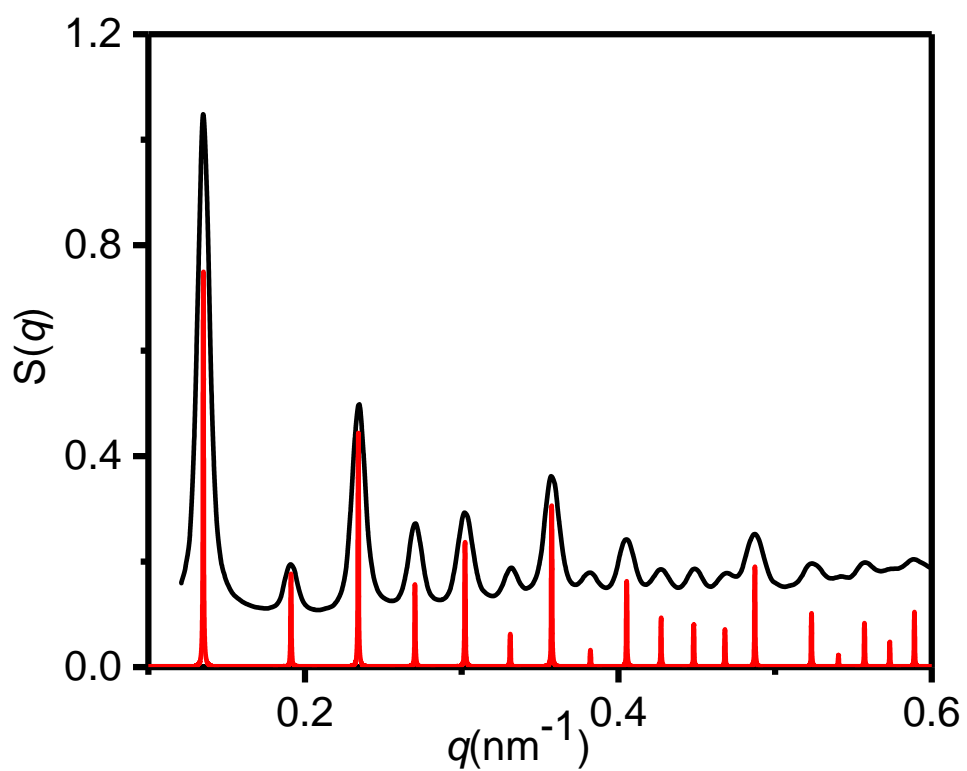

**Figure S13.** Enlargement of structure factor result for the body-centered cubic lattice shown in Figure 2e: black curve for the experimental data and red curve for the model.

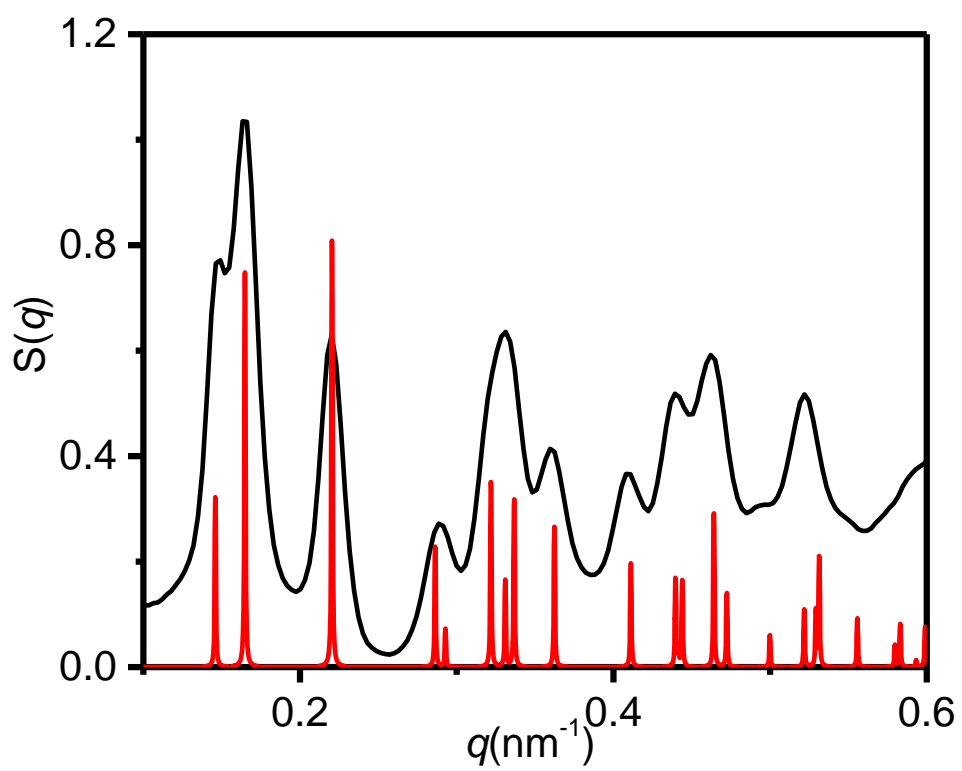

**Figure S14.** Enlargement of structure factor result for the simple hexagonal lattice shown in Figure 2f: black curve for the experimental data and red curve for the model.

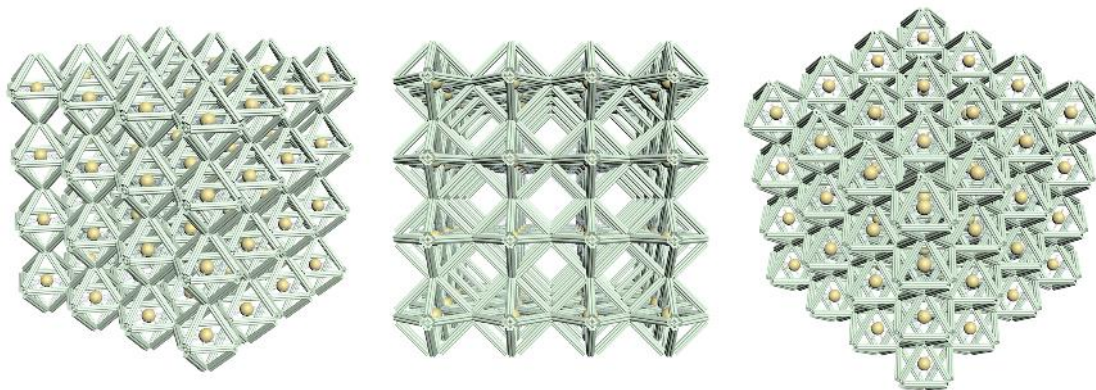

**Figure S15.** The close-packed models of simple cubic lattice formed by octahedral frames in different angles.

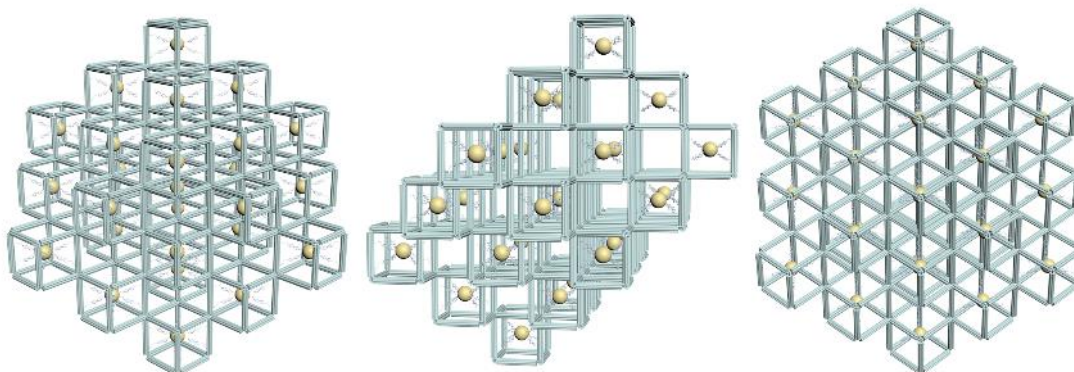

**Figure S16.** The close-packed models of body-centered cubic lattice formed by cubic frames in different angles.

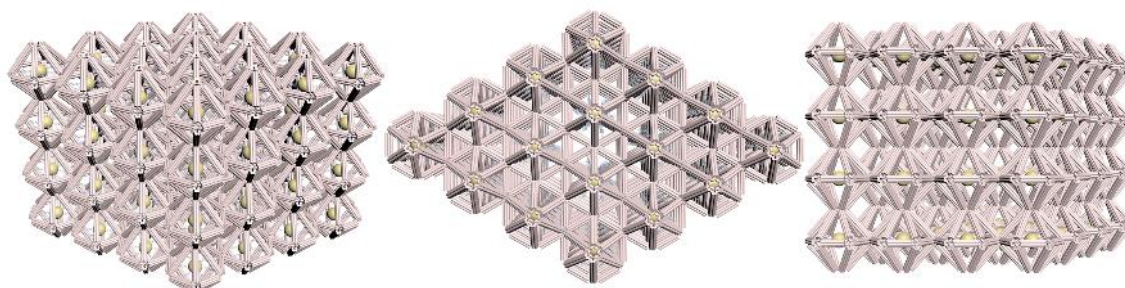

**Figure S17.** The close-packed models of simple hexagonal lattice formed by hexagonal bipyramid frames in different angles.

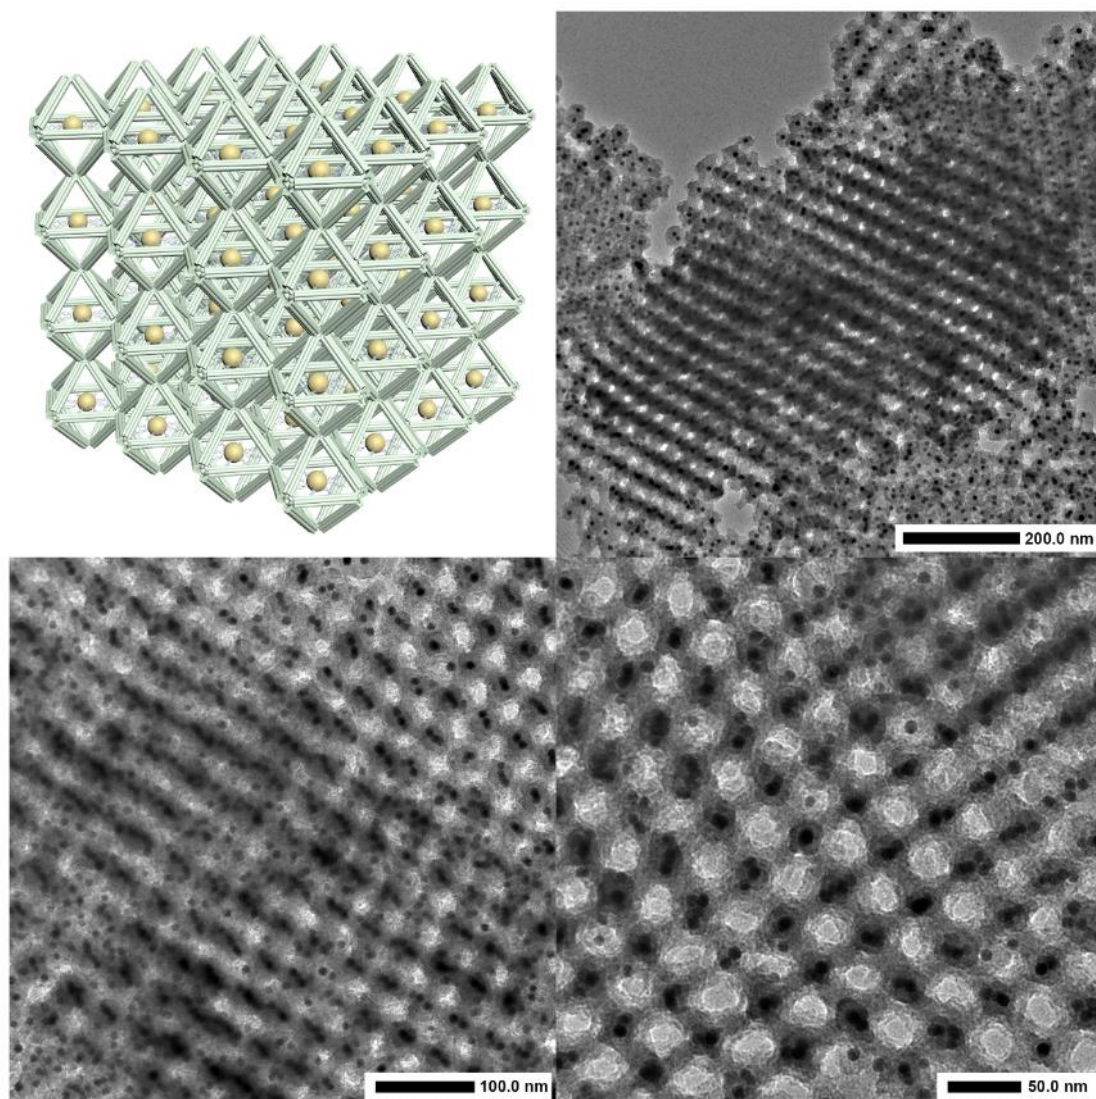

**Figure S18.** Representative TEM images of siliconized 3D lattices for octahedral frames. The schematic of the corresponding lattice model is shown on the upper left.



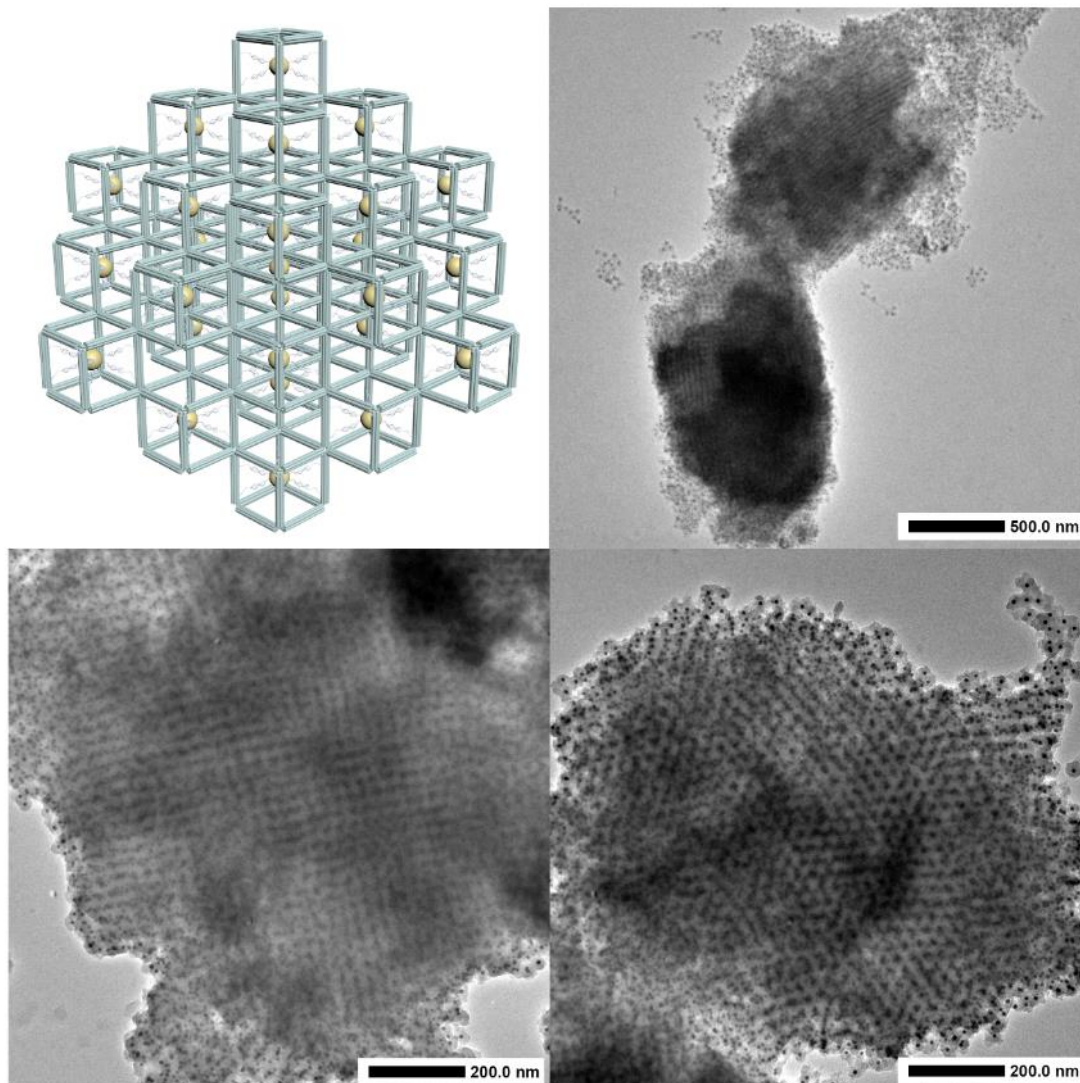

**Figure S19.** Representative TEM images of siliconized 3D lattices for cubic frames. The schematic of the corresponding lattice model is shown on the upper left.

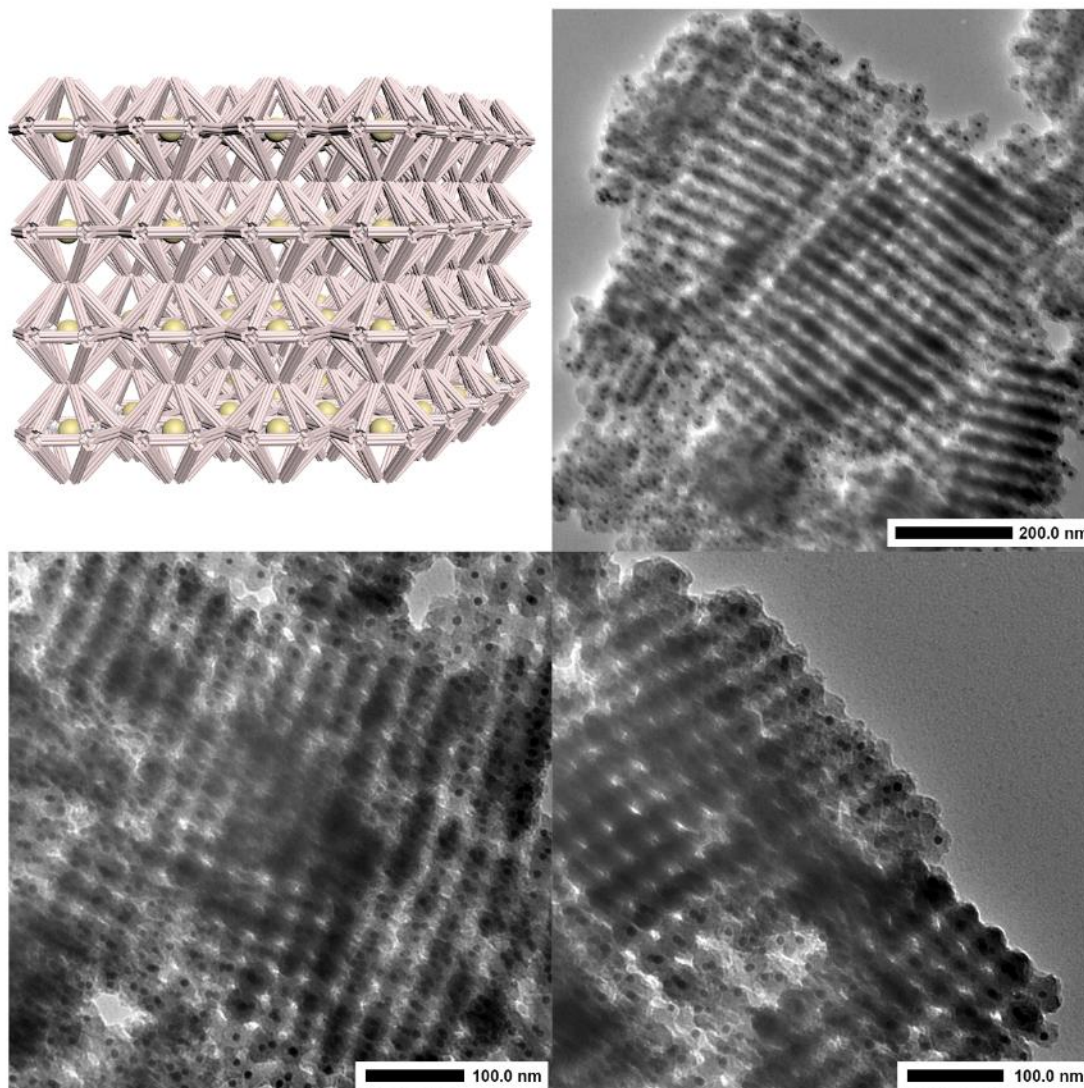

**Figure S20.** Representative TEM images of siliconized 3D lattices for hexagonal bipyramid frames. The schematic of the corresponding lattice model is shown on the upper left.

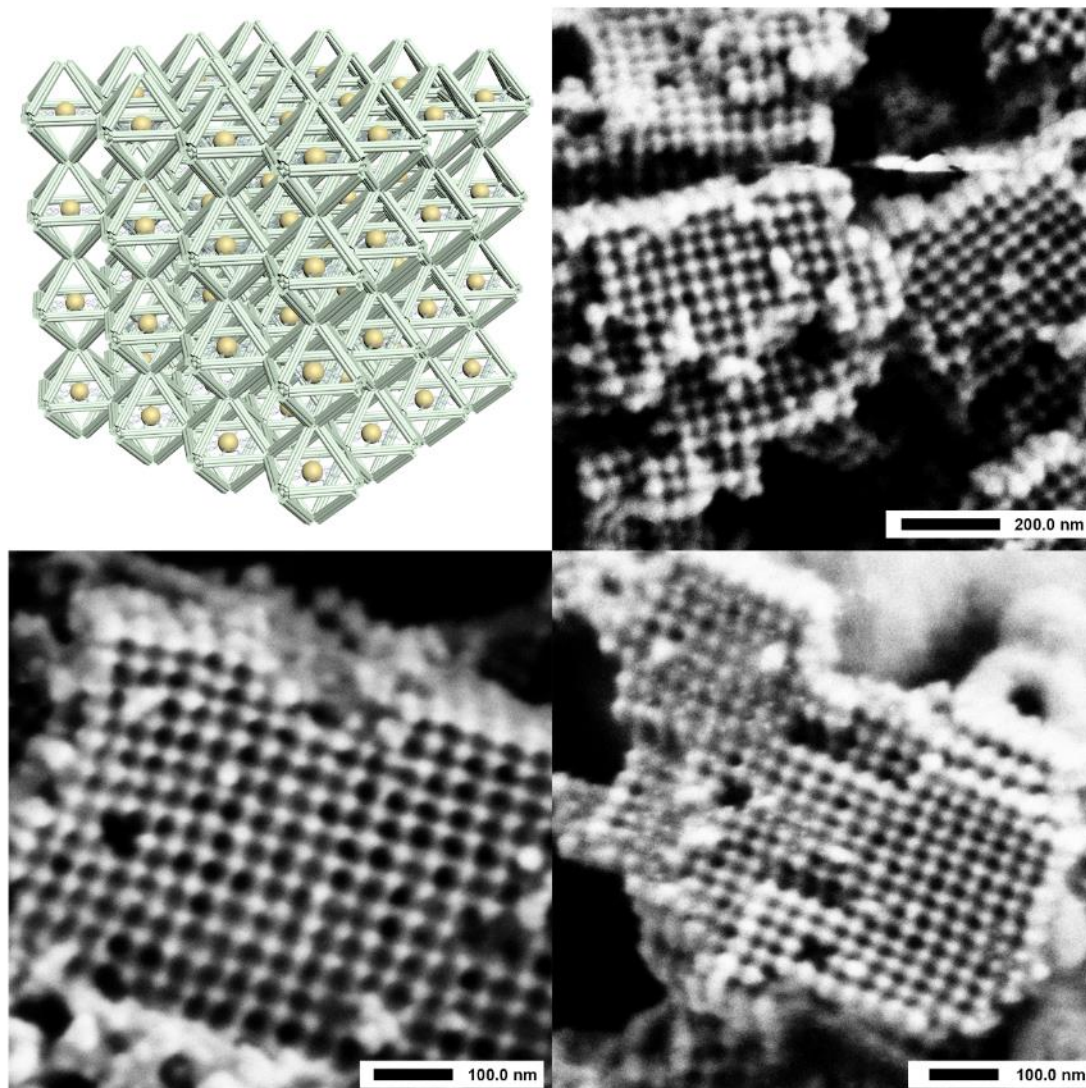

**Figure S21.** Representative SEM images of siliconized 3D lattices for octahedral frames. The schematic of the corresponding lattice model is shown on the upper left.

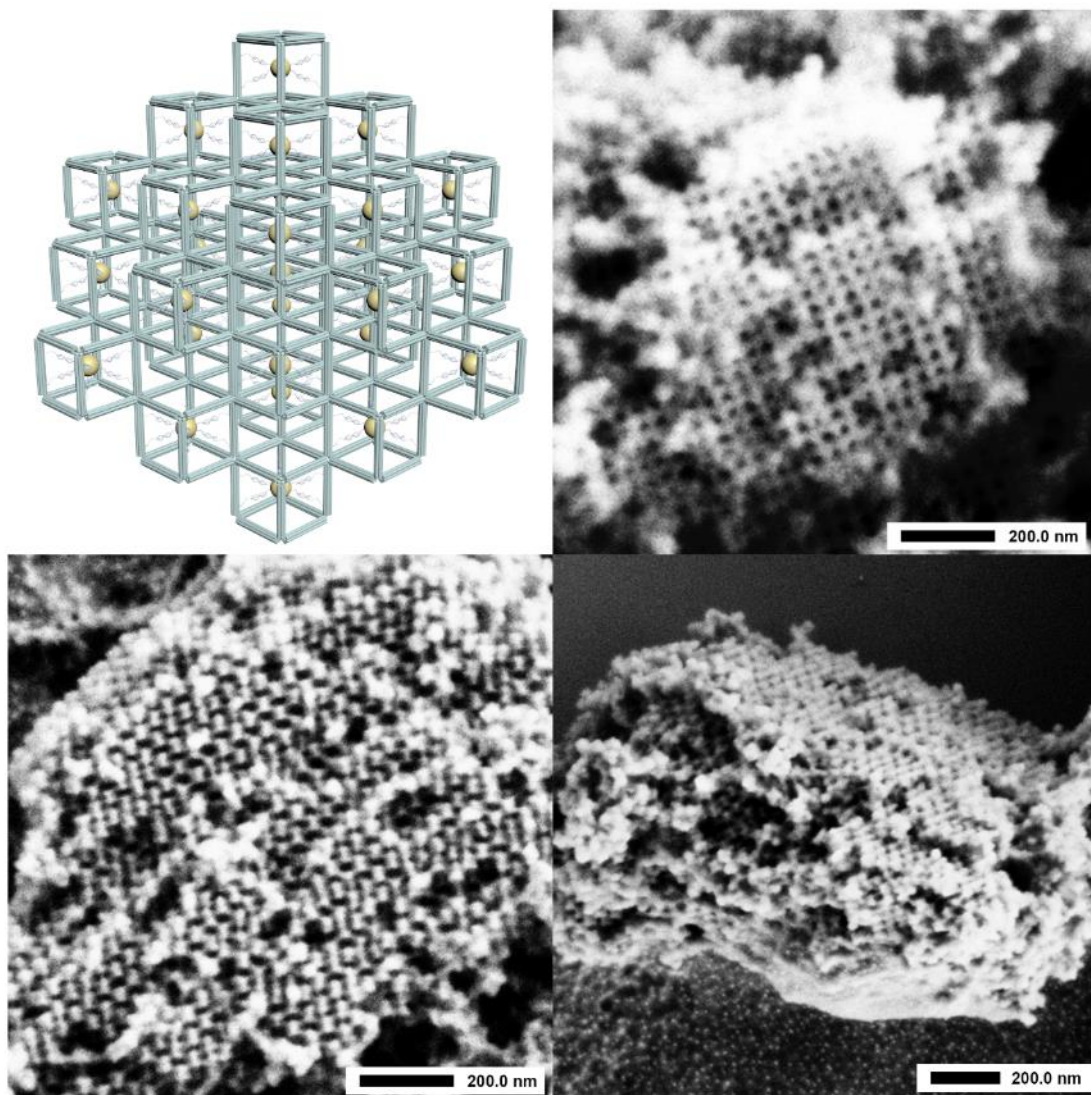

**Figure S22.** Representative SEM images of siliconized 3D lattices for cubic frames. The schematic of the corresponding lattice model is shown on the upper left.

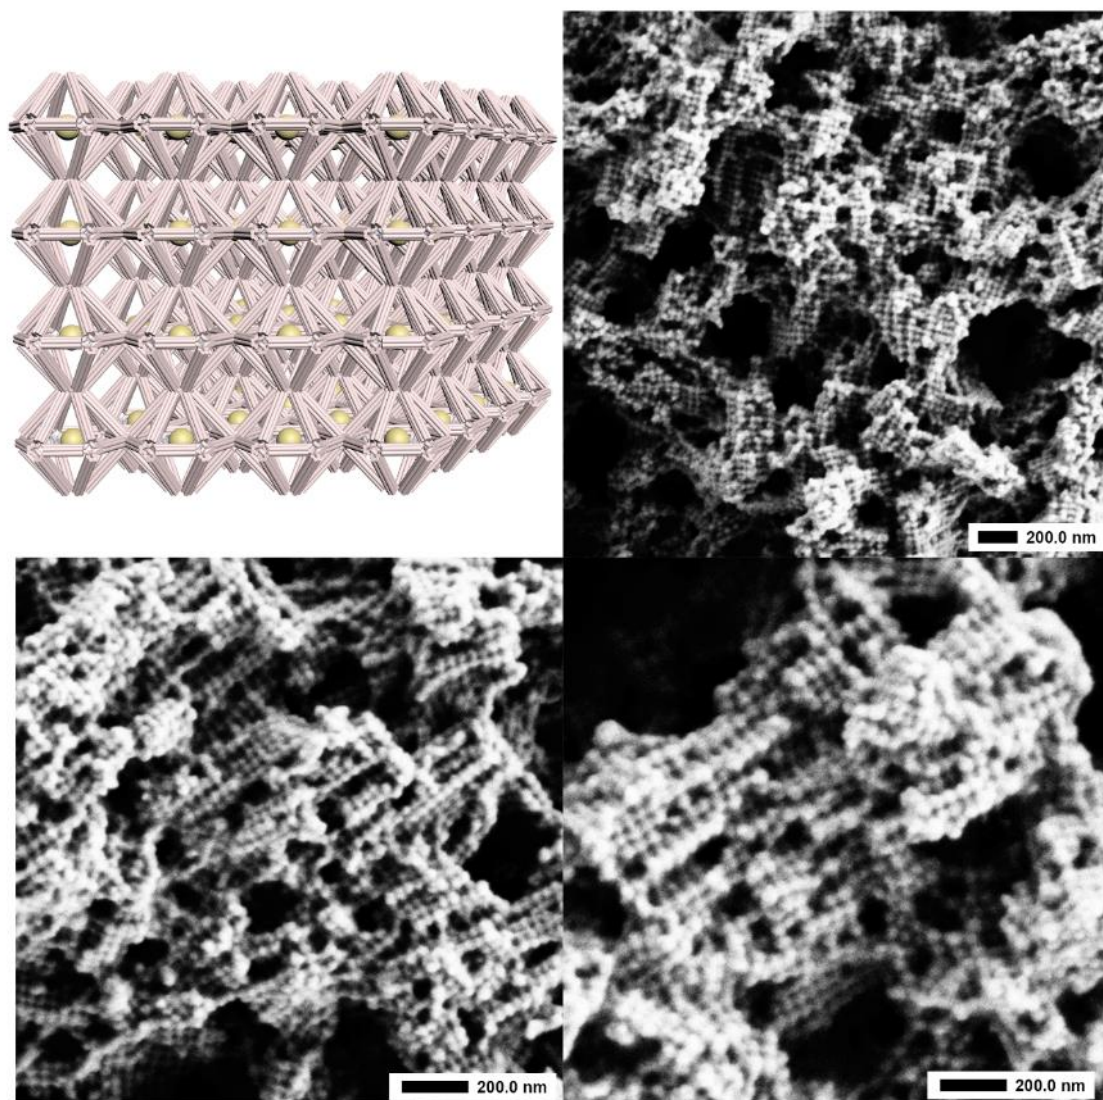

**Figure S23.** Representative SEM images of siliconized 3D lattices for hexagonal bipyramid frames. The schematic of the corresponding lattice model is shown on the upper left.

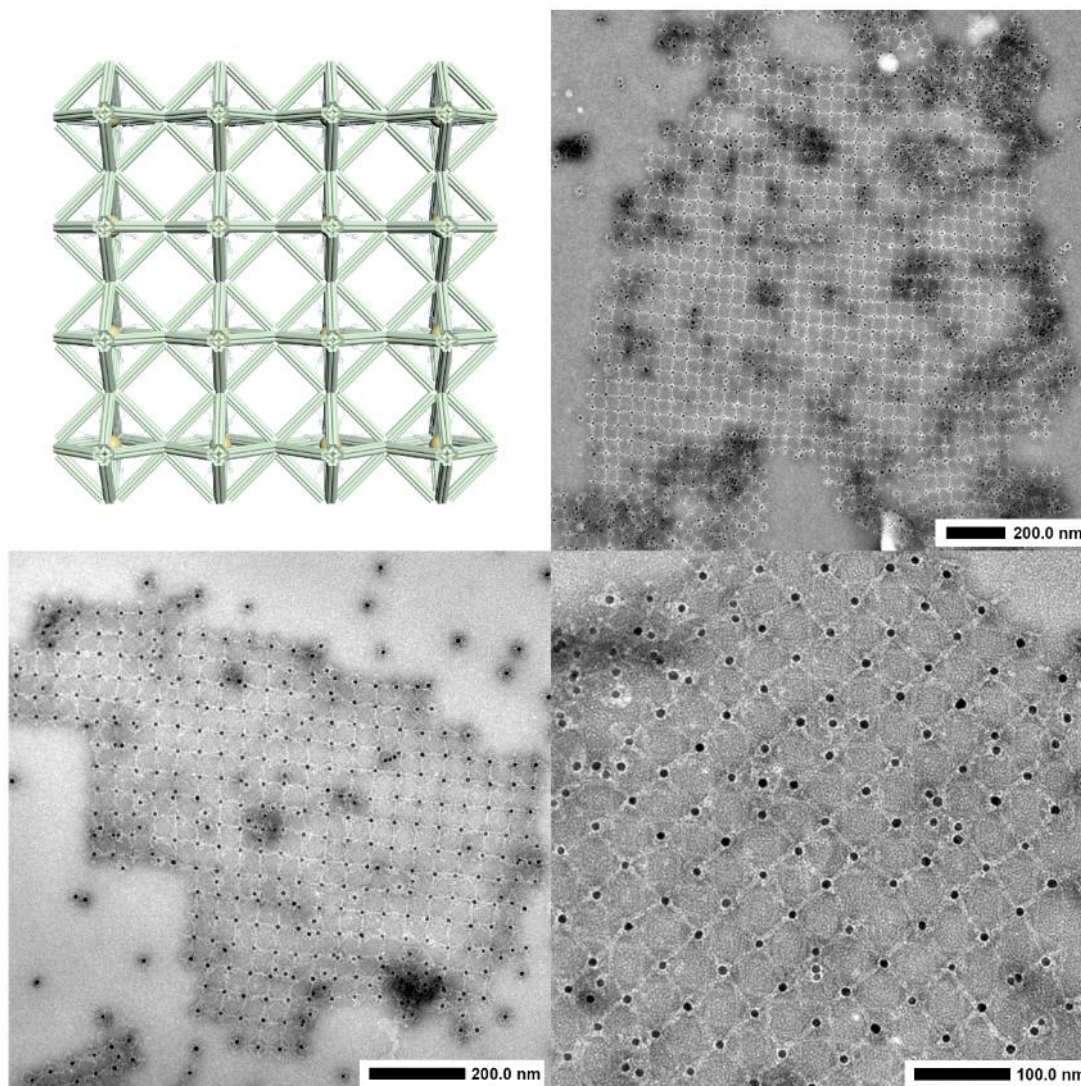

**Figure S24.** Representative negative-stained TEM images of 2D planar structures formed by AuNP-octahedron monomers. The corresponding schematic is shown on the upper left.

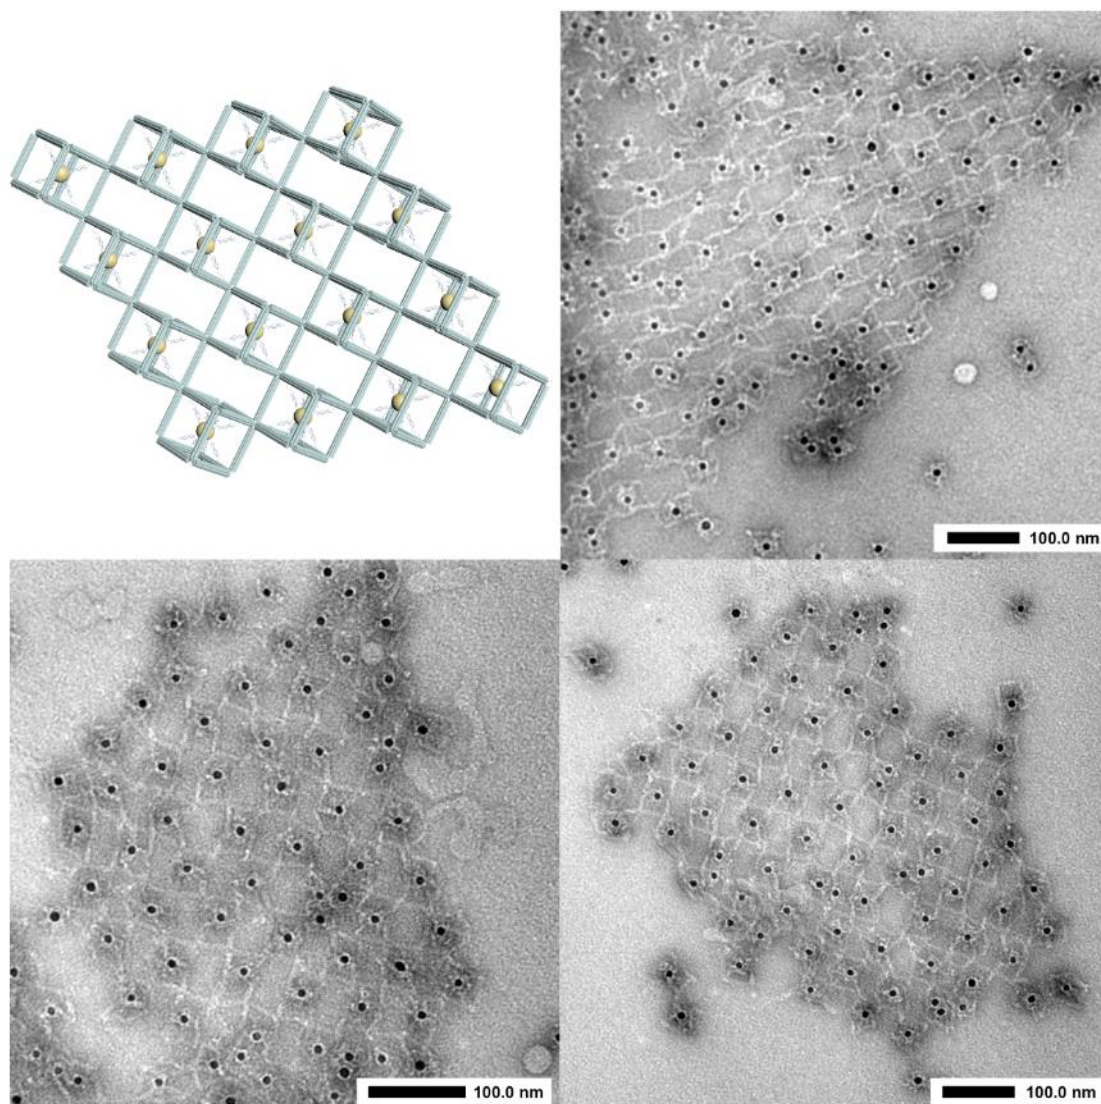

**Figure S25.** Representative negative-stained TEM images of 2D planar structures formed by AuNP-cube monomers. The corresponding schematic is shown on the upper left.

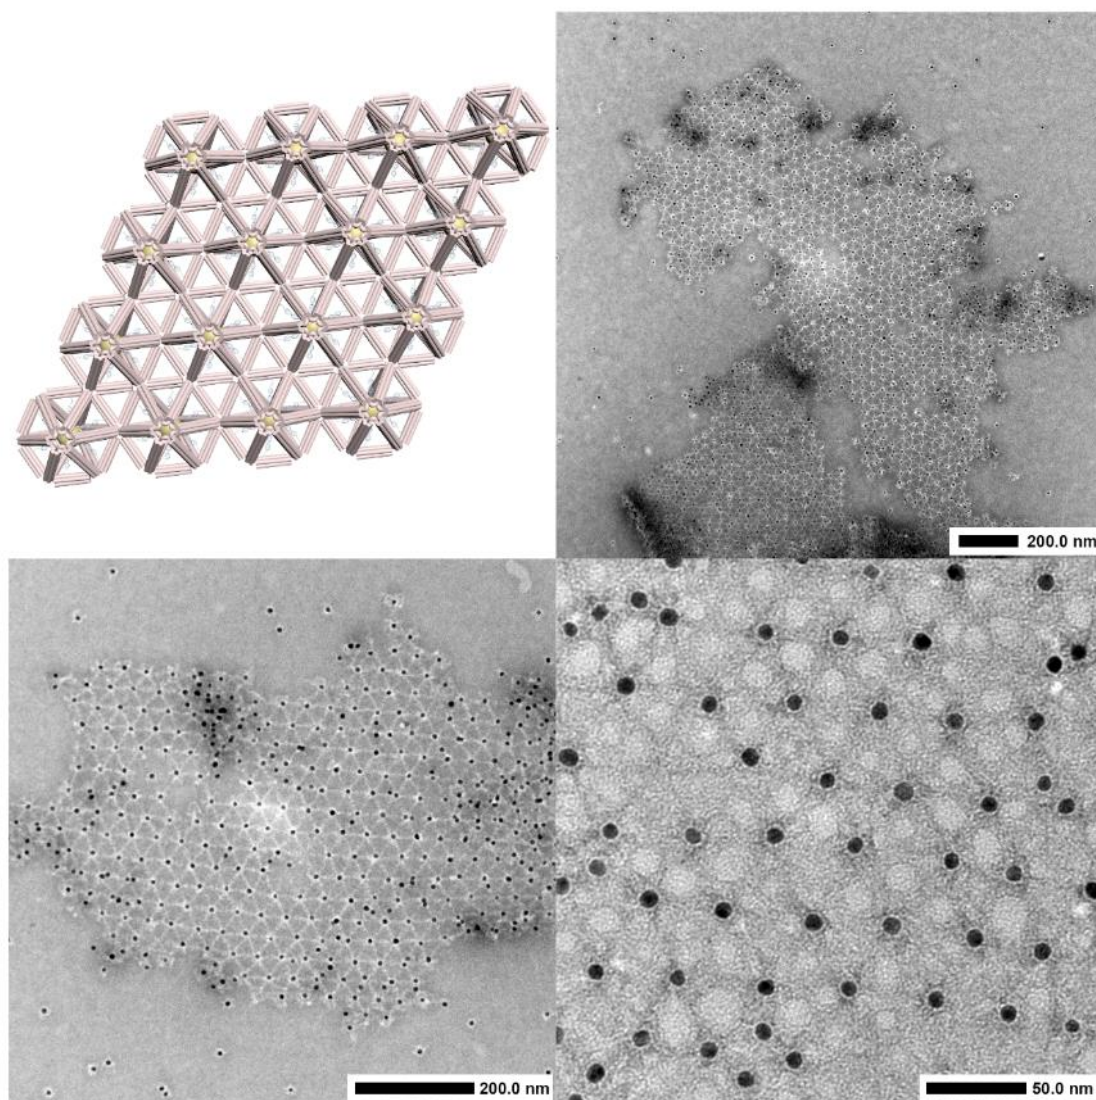

**Figure S26.** Representative negative-stained TEM images of 2D planar structures formed by AuNP-hexagonal bipyramid monomers. The corresponding schematic is shown on the upper left.



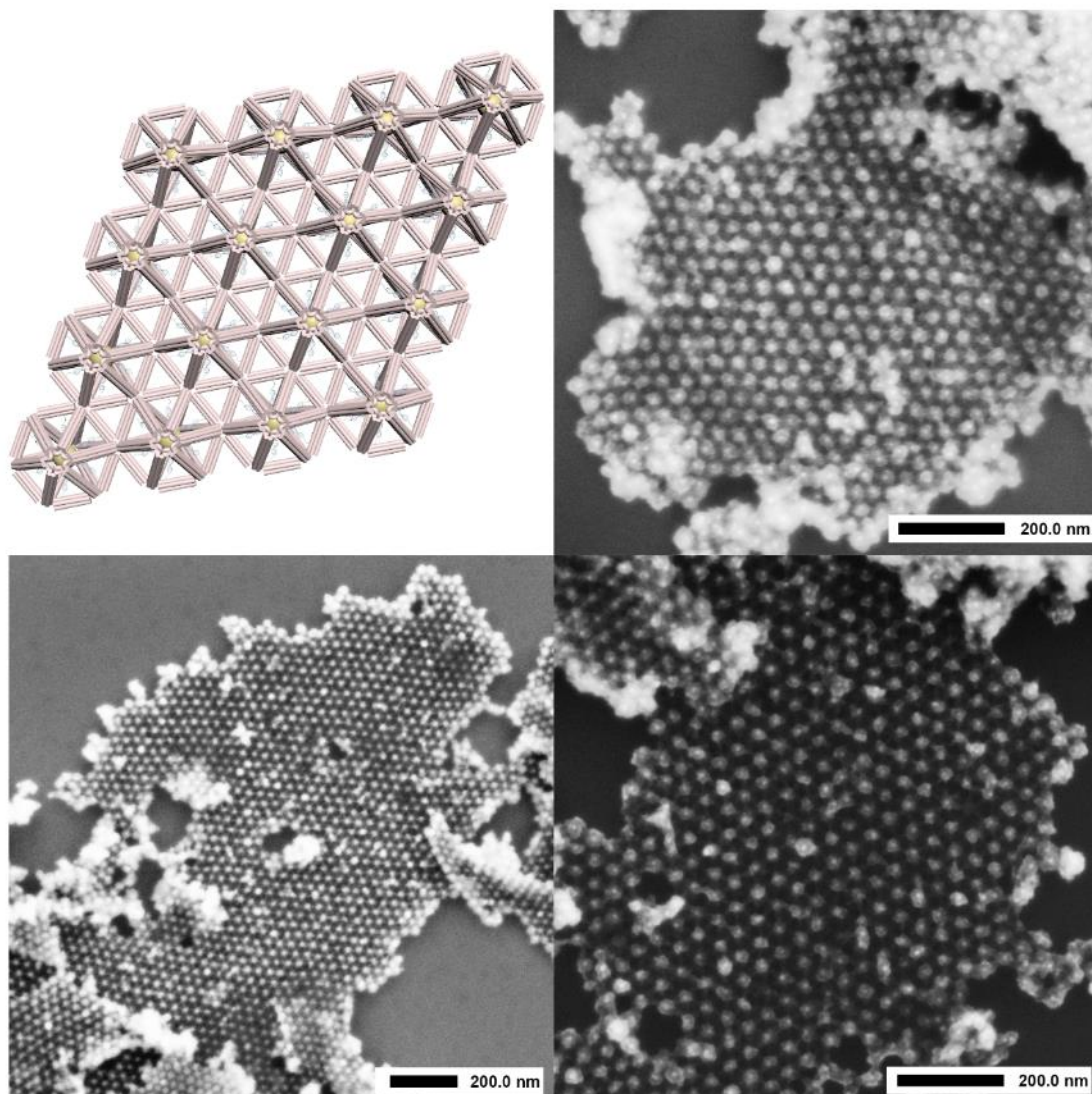

**Figure S27.** Representative SEM images of siliconized 2D planar structures formed by AuNP-hexagonal bipyramid monomers. The corresponding schematic is shown on the upper left.

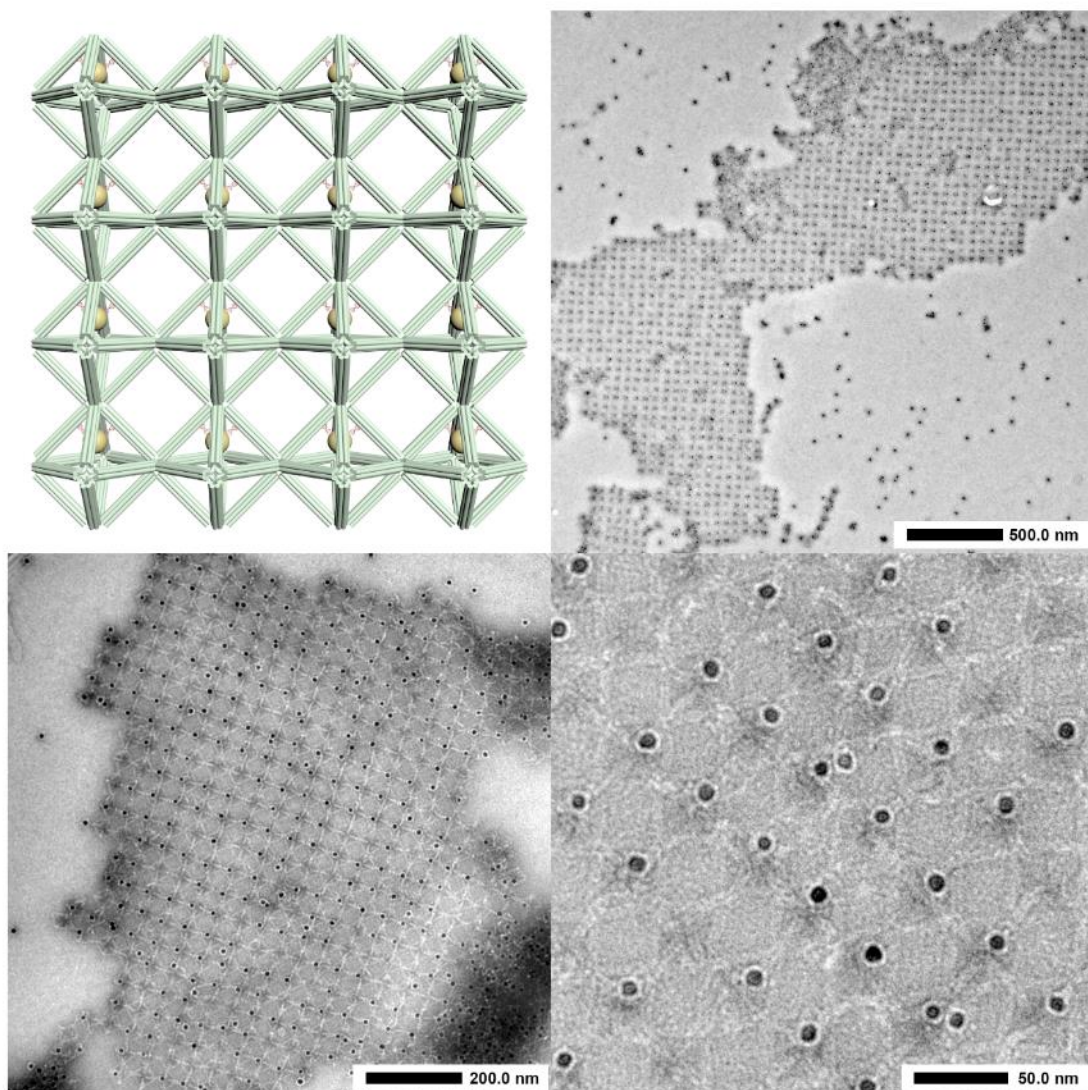

**Figure S28.** Representative negative-stained TEM images of 2D planar structures for the conjugated monomer with AuNPs near the vertex. The corresponding schematic is shown on the upper left.

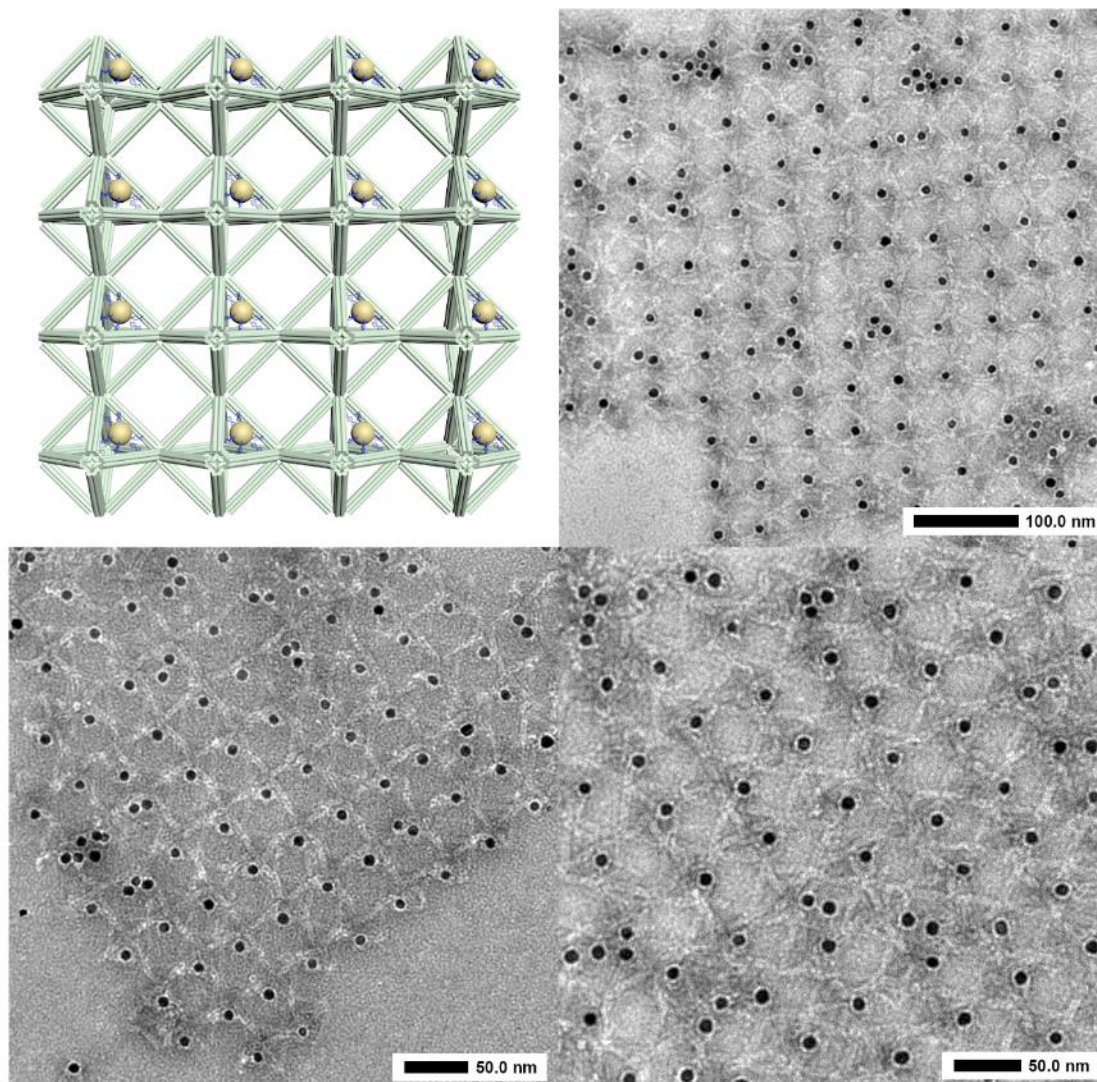

**Figure S29.** Representative negative-stained TEM images of 2D planar structures for the conjugated monomer with AuNPs in the face center. The corresponding schematic is shown on the upper left.

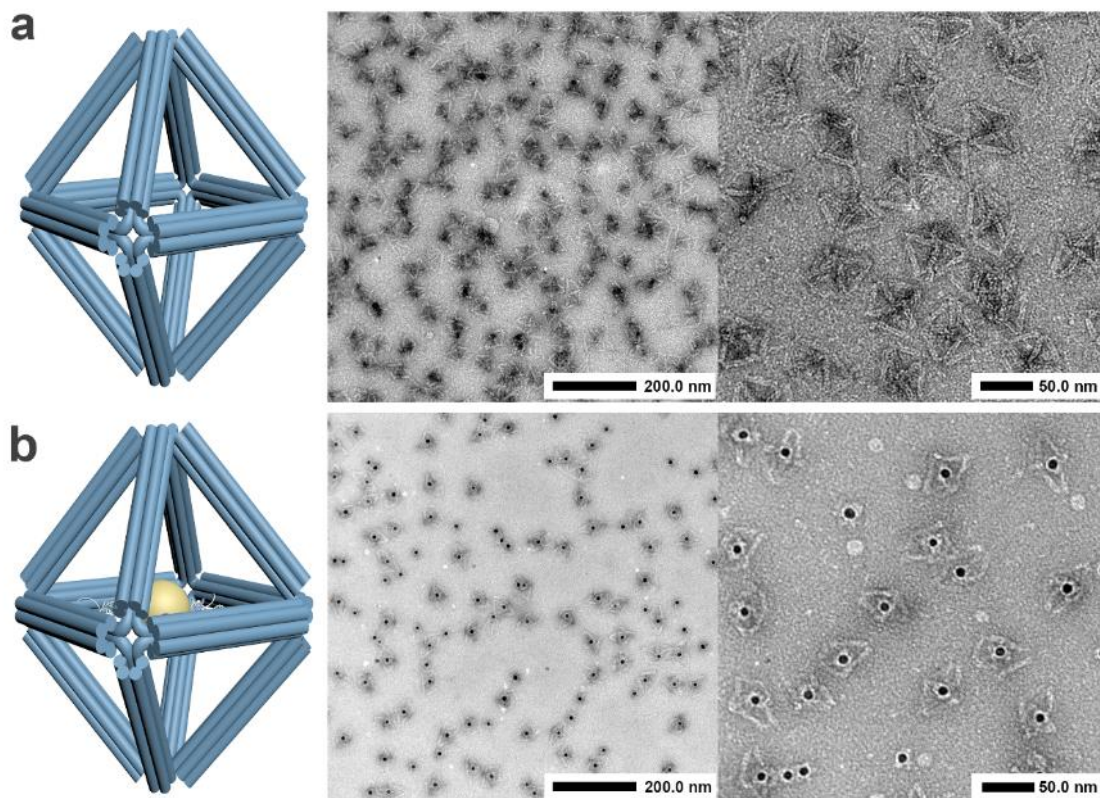

**Figure S30.** a) Representative negative-stained TEM images of elongated octahedral DNA origami frames. b) Representative negative-stained TEM images of AuNP-elongated octahedron monomers. Corresponding schematics are shown on the left.

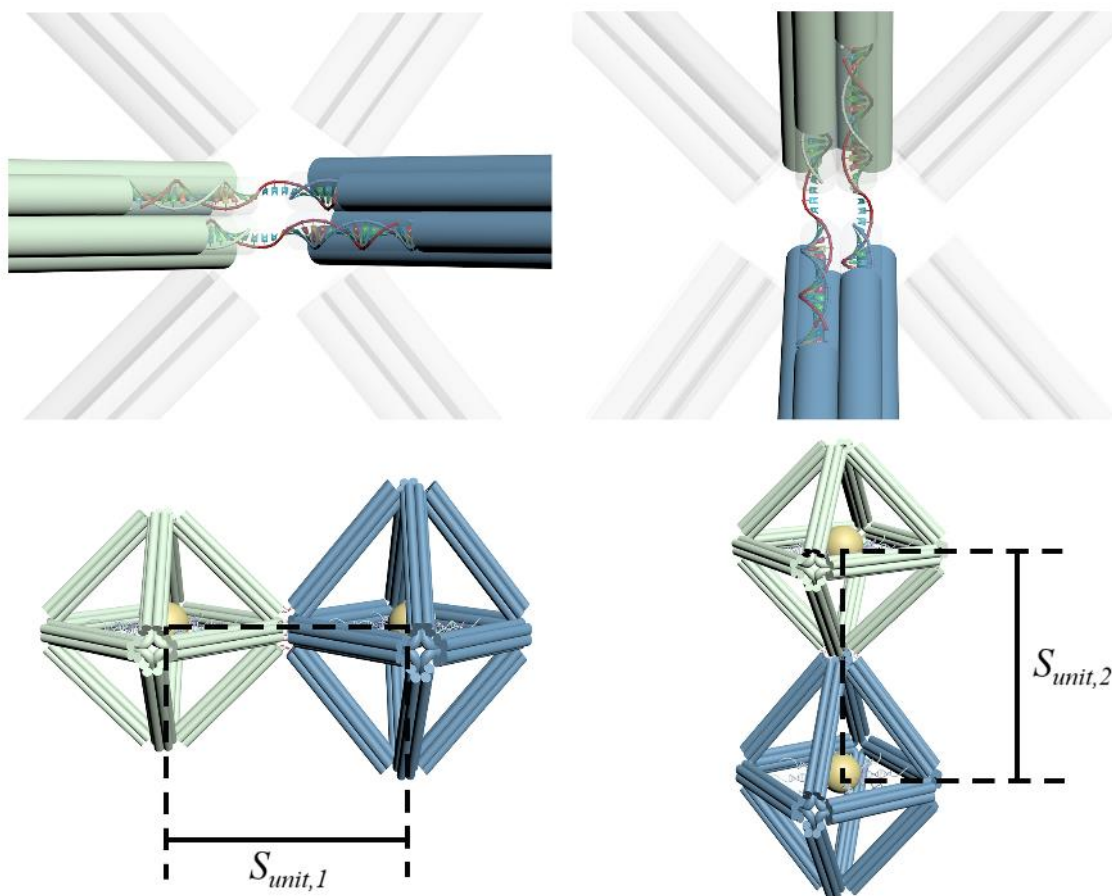

**Figure S31.** The magnified schematics of the bridge pattern for the binary system at vertex junctions.  $S_{unit,1}$  and  $S_{unit,2}$  respectively represents the distance between the body centers of adjacent frames in non-identical crystallographic axis directions.

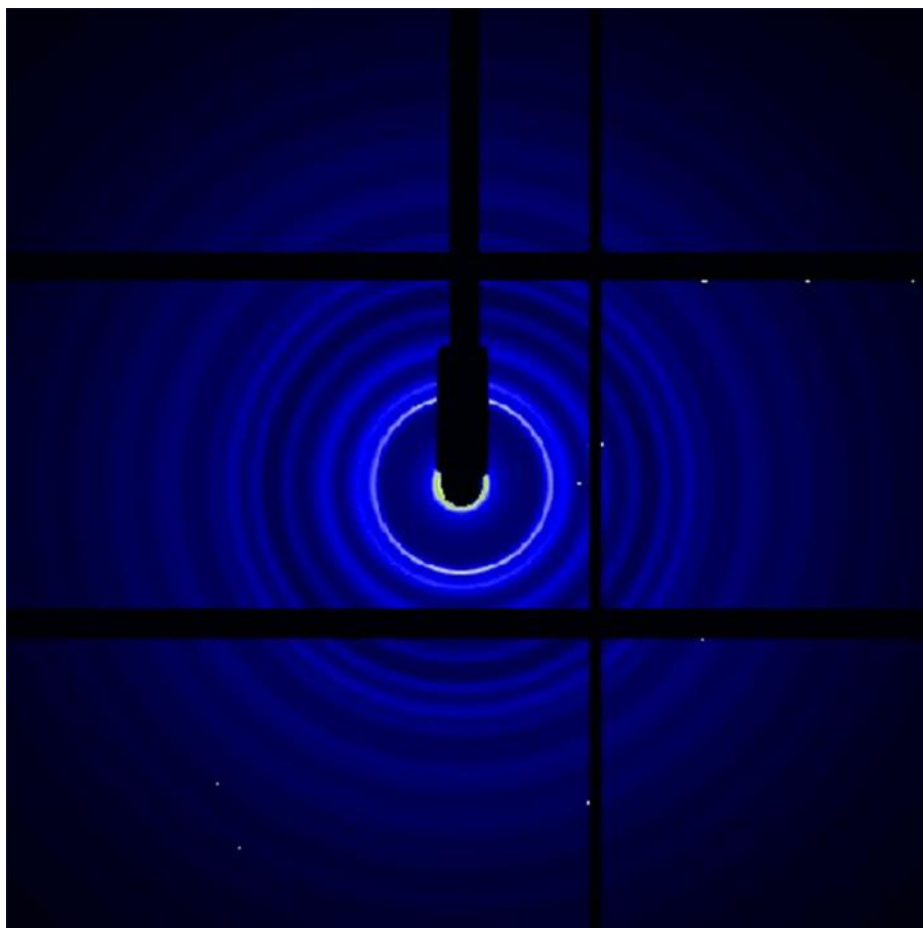

**Figure S32.** 2D pattern of the AuNP lattice in the binary system measured by SAXS.

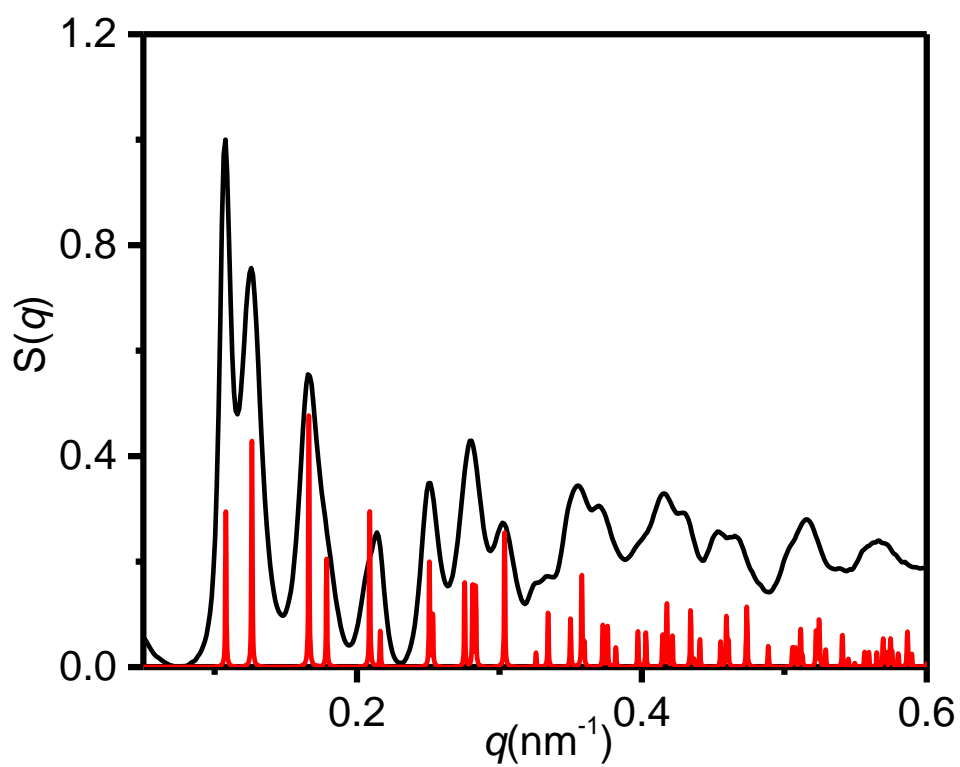

**Figure S33.** Enlargement of structure factor result for the tetragonal lattice shown in Figure 5b: black curve for the experimental data and red curve for the model.

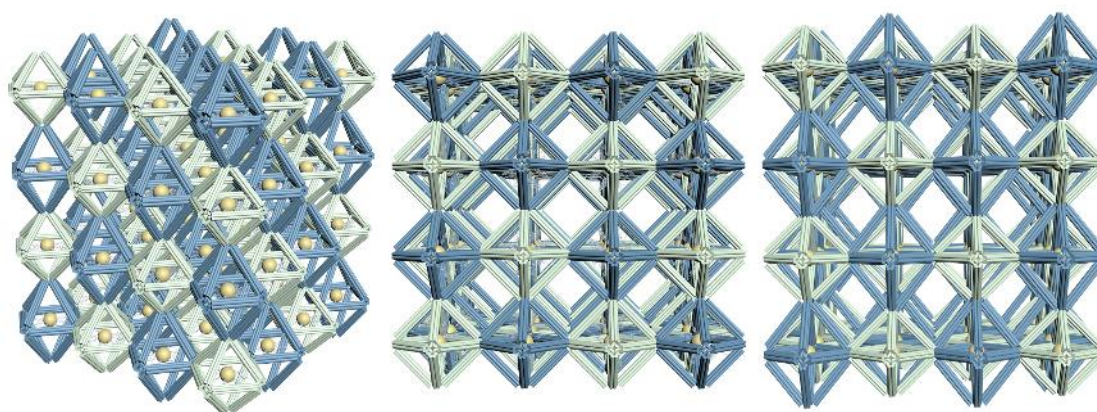

**Figure S34.** The close-packed models of tetragonal lattice of the binary system in different angles.

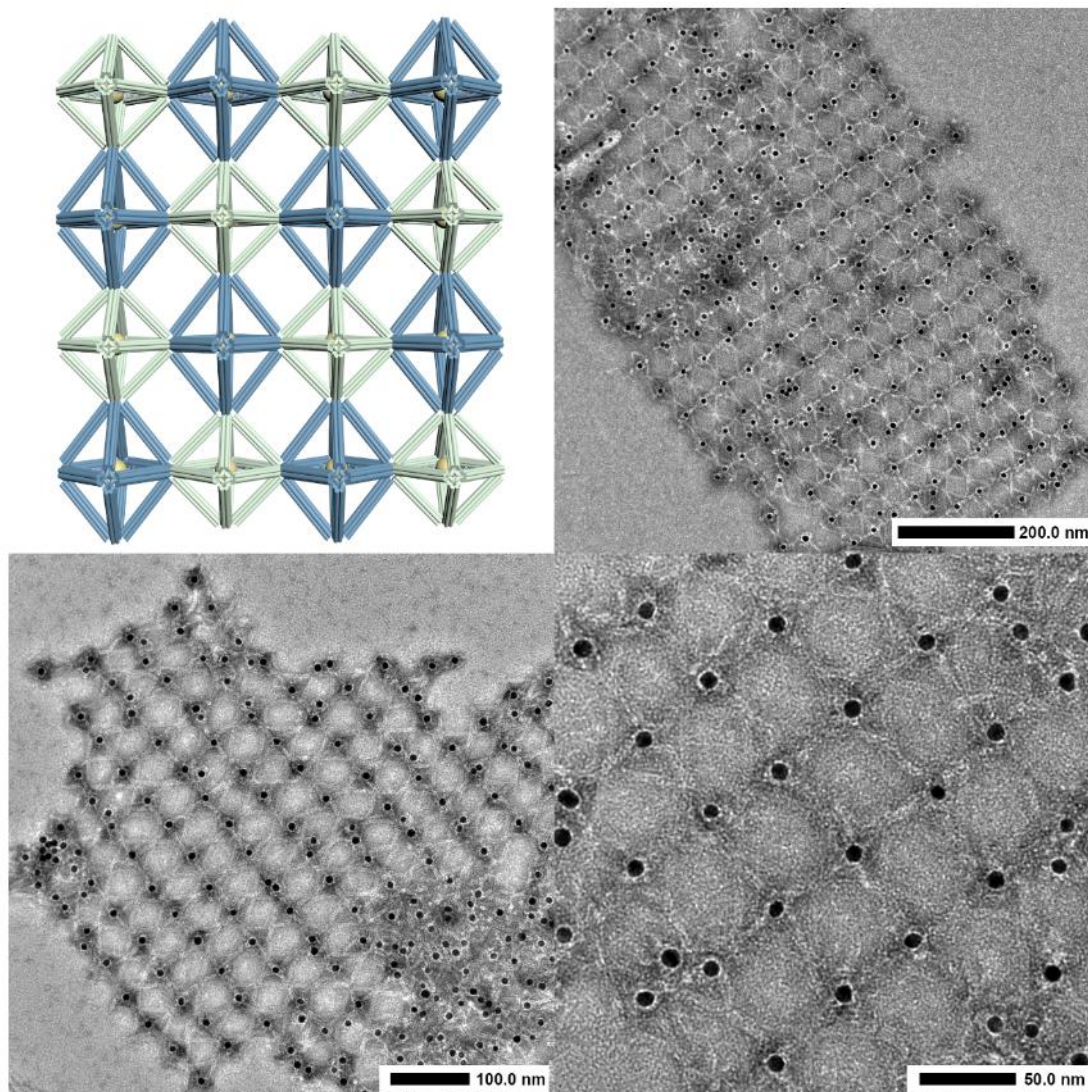

**Figure S35.** Representative negative-stained TEM images of 2D planar structures of the binary system. The corresponding schematic is shown on the upper left.



| Assembly method                | Bridge pattern    |      | Sticky-end hybridization |      |
|--------------------------------|-------------------|------|--------------------------|------|
|                                |                   |      | (Nat. Mater., 2020)      |      |
| Frame shape                    | Octahedron        | Cube | Octahedron               | Cube |
| Lattice type                   | SC                | BCC  | SC                       | BCC  |
| Identifiable peaks in SAXS     | ~15               | ~18  | ~25                      | ~15  |
| Average size of ordered grains | ~ 1 $\mu\text{m}$ |      | ~ 3-5 $\mu\text{m}$      |      |
| Anisotropy control             | Yes               |      | No                       |      |

**Table S1.** Comparison of bridging method and sticky-end hybridization method (Nat. Mater., 2020, 19, 789-796.).

## References

1. X. Liu, F. Zhang, X. Jing, M. Pan, P. Liu, W. Li, B. Zhu, J. Li, H. Chen, L. Wang, J. Lin, Y. Liu, D. Zhao, H. Yan and C. Fan, *Nature*, 2018, 559, 593-598.
2. Y. Tian, J. R. Lhermitte, L. Bai, T. Vo, H. L. Xin, H. Li, R. Li, M. Fukuto, K. G. Yager, J. S. Kahn, Y. Xiong, B. Minevich, S. K. Kumar and O. Gang, *Nat. Mater.*, 2020, 19, 789-796.
